# Supplementary material
Source: PubMed Central journal article supplement (PMC6138451)
Supplement: NIHMS987390-supplement-1.pdf [file NIHMS987390-supplement-1.pdf]

# THE LANCET

## Global Health

### Supplementary appendix

This appendix formed part of the original submission and has been peer reviewed. We post it as supplied by the authors.

Supplement to: Ford ND, Behrman JR, Hoddinott JF. Exposure to improved nutrition from conception to age 2 years and adult cardiometabolic disease risk: a modelling study. *Lancet Glob Health* 2018; **6**: e875–84.

**Supplemental Table 1. Characteristics of Participants Lost to Follow Up. INCAP Nutrition Supplementation Trial Longitudinal Cohort, Guatemala, 1969-2017**

|                                                    | Death |                         | International Migration |                         | Did Not Otherwise Participate in 2015-17 Study Wave |                         | Participated in 2015-17 Study Wave |                         | Total |                         |
|----------------------------------------------------|-------|-------------------------|-------------------------|-------------------------|-----------------------------------------------------|-------------------------|------------------------------------|-------------------------|-------|-------------------------|
|                                                    | n     |                         | n                       |                         | n                                                   |                         | n                                  |                         | n     |                         |
| Female                                             | 369   | 39.6                    | 249                     | 37.0                    | 613                                                 | 36.7                    | 1,161                              | 60.2                    | 2,392 | 48.6                    |
| Exposed to <i>Atole</i> from conception to age 2 y | 369   | 25.6                    | 249                     | 25.3                    | 613                                                 | 20.1                    | 1,161                              | 22.4                    | 2,392 | 22.6                    |
| Childhood household SES                            | 369   | 0.006<br>(-0.51, 0.46)  | 249                     | 0.10<br>(-0.40, 0.64)   | 613                                                 | -0.07<br>(-0.53, 0.22)  | 1,161                              | -0.02<br>(-0.52, 0.46)  | 2,392 | -0.02<br>(-0.51, 0.46)  |
| Maternal age, y                                    | 358   | 26.0 (21.0, 34.0)       | 283                     | 25.0 (21.0, 32.0)       | 573                                                 | 26.0 (21.0, 32.0)       | 921                                | 26.0 (21.0, 32.0)       | 2,315 | 26.0 (21.0, 32.0)       |
| Maternal height, cm                                | 282   | 148.3<br>(145.2, 152.3) | 186                     | 149.8<br>(146.6, 153.0) | 410                                                 | 149.1<br>(145.3, 152.5) | 921                                | 148.6<br>(145.4, 152.3) | 1,799 | 148.6<br>(145.5, 152.5) |
| Maternal schooling, y                              | 320   | 0.0 (0.0, 2.0)          | 225                     | 2.0 (0.0, 2.0)          | 504                                                 | 1.0 (0.0, 2.0)          | 1,120                              | 0.0 (0.0, 2.0)          | 2,169 | 1.0 (0.0, 2.0)          |

Values presented are medians (25<sup>th</sup>, 75<sup>th</sup> percentiles) or percents.

Abbreviations: INCAP, Institute of Nutrition for Central America and Panama.

**Supplemental Table 2. Selected Characteristics of the Study Population, by Supplement Type and Age at Exposure to the Intervention, for men and women. INCAP Nutrition Supplementation Trial Longitudinal Cohort, Guatemala, 1969-2017**

|                               | Women |                         |        |                         |                                                             |                         |                                          |                         | Men   |                         |        |                         |                                                             |                         |                                          |                         |
|-------------------------------|-------|-------------------------|--------|-------------------------|-------------------------------------------------------------|-------------------------|------------------------------------------|-------------------------|-------|-------------------------|--------|-------------------------|-------------------------------------------------------------|-------------------------|------------------------------------------|-------------------------|
|                               | Atole |                         | Fresco |                         | Exposed to Intervention During Full Period Conception – 2 y |                         | Other Timing of Exposure to Intervention |                         | Atole |                         | Fresco |                         | Exposed to Intervention During Full Period Conception – 2 y |                         | Other Timing of Exposure to Intervention |                         |
|                               | n     |                         | n      |                         | n                                                           |                         | n                                        |                         | n     |                         | n      |                         | n                                                           |                         | n                                        |                         |
| Age at follow-up, y           | 377   | 45.0<br>(42.0, 49.0)    | 307    | 45.0<br>(41.0, 49.0)    | 242                                                         | 43.0<br>(41.0, 44.0)    | 442                                      | 47.0<br>(42.0, 50.0)    | 242   | 44.0<br>(41.0, 48.0)    | 213    | 45.0<br>(42.0, 48.0)    | 153                                                         | 43.0<br>(42.0, 44.0)    | 302                                      | 47.0<br>(41.0, 49.0)    |
| Childhood household SES       | 377   | -0.02<br>(-0.51, 0.42)  | 307    | -0.07<br>(-0.79, 0.53)  | 242                                                         | -0.02<br>(-0.51, 0.56)  | 442                                      | -0.07<br>(-0.58, 0.17)  | 242   | 0.02<br>(-0.49, 0.46)   | 213    | -0.03<br>(-0.60, 0.57)  | 153                                                         | 0.02<br>(-0.51, 0.54)   | 302                                      | -0.01<br>(-0.51, 0.31)  |
| Maternal age, y               | 373   | 26.0<br>(21.0, 31.0)    | 298    | 26.0<br>(21.0, 33.0)    | 238                                                         | 26.5<br>(21.0, 32.0)    | 433                                      | 26.0<br>(21.0, 32.0)    | 240   | 25.0<br>(21.0, 33.0)    | 208    | 26.0<br>(21.0, 32.0)    | 153                                                         | 25.0<br>(21.0, 32.0)    | 295                                      | 26.0<br>(22.0, 33.0)    |
| Maternal height, cm           | 288   | 149.3<br>(145.6, 152.7) | 255    | 148.5<br>(144.9, 151.7) | 214                                                         | 148.6<br>(145.8, 155.2) | 329                                      | 148.8<br>(144.9, 152.2) | 191   | 148.2<br>(146.2, 152.7) | 166    | 148.2<br>(146.0, 152.7) | 140                                                         | 149.2<br>(146.4, 152.5) | 217                                      | 148.2<br>(146.0, 152.7) |
| Maternal schooling, y         | 371   | 0.0<br>(0.0, 2.0)       | 294    | 1.0<br>(0.0, 3.0)       | 239                                                         | 1.0<br>(0.0, 2.0)       | 426                                      | 0.0<br>(0.0, 2.0)       | 237   | 0.0<br>(0.0, 2.0)       | 196    | 2.0<br>(0.0, 3.0)       | 150                                                         | 1.0<br>(0.0, 2.0)       | 283                                      | 1.0<br>(0.0, 3.0)       |
| Residing in Guatemala City, % | 377   | 19.4                    | 307    | 16.6                    | 242                                                         | 18.6                    | 442                                      | 17.9                    | 242   | 13.6                    | 213    | 23.9                    | 153                                                         | 15.0                    | 302                                      | 20.2                    |
| SES tertile, %                | 377   |                         | 307    |                         | 242                                                         |                         | 442                                      |                         | 242   |                         | 213    |                         | 153                                                         |                         | 302                                      |                         |
| Poorest                       |       | 33.2                    |        | 30.9                    |                                                             | 32.6                    |                                          | 31.9                    |       | 39.3                    |        | 29.6                    |                                                             | 37.2                    |                                          | 33.4                    |
| Middle                        |       | 29.7                    |        | 42.0                    |                                                             | 33.9                    |                                          | 36.0                    |       | 28.9                    |        | 30.5                    |                                                             | 24.2                    |                                          | 32.4                    |
| Wealthiest                    |       | 37.1                    |        | 27.0                    |                                                             | 33.5                    |                                          | 32.1                    |       | 31.8                    |        | 39.9                    |                                                             | 38.6                    |                                          | 34.1                    |
| Total grades completed        | 370   | 3.0<br>(2.0, 6.0)       | 297    | 5.0<br>(3.0, 6.0)       | 241                                                         | 4.0<br>(2.0, 6.0)       | 426                                      | 4.0<br>(2.0, 6.0)       | 236   | 3.0<br>(2.0, 6.0)       | 201    | 6.0<br>(4.0, 7.0)       | 153                                                         | 6.0<br>(2.0, 6.0)       | 284                                      | 6.0<br>(2.0, 6.0)       |
| Height, cm                    | 376   | 152.2<br>(148.7, 155.7) | 307    | 150.6<br>(147.3, 153.9) | 242                                                         | 150.9<br>(147.8, 155.2) | 441                                      | 151.7<br>(148.4, 155.0) | 241   | 163.7<br>(159.3, 168.0) | 213    | 164.6<br>(160.1, 167.8) | 153                                                         | 164.0<br>(159.9, 167.9) | 301                                      | 164.2<br>(159.8, 167.8) |
| BMI, kg/m <sup>2</sup>        | 376   | 28.7<br>(25.7, 31.7)    | 307    | 28.7<br>(25.6, 32.8)    | 242                                                         | 29.1<br>(26.2, 32.2)    | 441                                      | 28.4<br>(25.4, 32.2)    | 241   | 25.6<br>(22.9, 28.3)    | 213    | 26.8<br>(24.7, 30.1)    | 153                                                         | 26.0<br>(23.5, 33.0)    | 301                                      | 26.4<br>(23.9, 29.3)    |
| Obesity <sup>1</sup> , %      | 376   | 39.8                    | 307    | 41.0                    | 242                                                         | 41.7                    | 441                                      | 39.6                    | 241   | 12.8                    | 213    | 25.3                    | 153                                                         | 13.7                    | 301                                      | 21.2                    |
| Waist circumference, cm       | 376   | 100.0<br>(93.6, 107.8)  | 307    | 100.6<br>(93.2, 110.3)  | 242                                                         | 101.1<br>(94.3, 108.0)  | 441                                      | 99.9<br>(93.0, 108.8)   | 241   | 91.8<br>(84.3, 97.6)    | 213    | 96.5<br>(90.5, 103.3)   | 153                                                         | 93.1<br>(86.9, 98.6)    | 301                                      | 94.0<br>(88.0, 101.3)   |
| Waist-height ratio            | 376   | 0.66<br>(0.62, 0.71)    | 307    | 0.67<br>(0.62, 0.73)    | 242                                                         | 0.67<br>(0.62, 0.72)    | 441                                      | 0.66<br>(0.61, 0.72)    | 241   | 0.56<br>(0.51, 0.59)    | 213    | 0.59<br>(0.55, 0.63)    | 153                                                         | 0.57<br>(0.52, 0.61)    | 301                                      | 0.58<br>(0.54, 0.61)    |
| Body fat, %                   | 363   | 41.9<br>(38.5, 45.4)    | 299    | 43.0<br>(39.3, 46.9)    | 236                                                         | 42.9<br>(38.9, 45.9)    | 426                                      | 42.2<br>(38.9, 46.3)    | 229   | 28.2<br>(23.5, 31.4)    | 206    | 30.9<br>(26.3, 35.2)    | 148                                                         | 28.6<br>(23.4, 28.8)    | 287                                      | 29.3<br>(25.4, 34.0)    |
| Triglycerides (mg/dL)         | 370   | 205.7<br>(151.3, ...)   | 300    | 198.5<br>(155.4, ...)   | 239                                                         | 198.9<br>(155.2, ...)   | 431                                      | 204.0<br>(151.3, ...)   | 227   | 193.0<br>(148.6, ...)   | 208    | 209.6<br>(148.9, ...)   | 146                                                         | 198.1<br>(138.3, ...)   | 289                                      | 205.9<br>(151.1, 286.2) |

|                                   |     |                                  |     |                                  |     |                                  |     |                                  |     |                                  |     |                                  |     |                                  |     |                         |
|-----------------------------------|-----|----------------------------------|-----|----------------------------------|-----|----------------------------------|-----|----------------------------------|-----|----------------------------------|-----|----------------------------------|-----|----------------------------------|-----|-------------------------|
| TC (mg/dL)                        | 370 | 278.6<br>192.0<br>(167.9, 219.0) | 300 | 266.4<br>184.7<br>(159.5, 206.3) | 239 | 267.9<br>184.6<br>(160.7, 211.9) | 431 | 276.6<br>188.7<br>(166.1, 213.6) | 227 | 296.3<br>182.1<br>(150.5, 202.5) | 208 | 287.4<br>174.4<br>(152.8, 198.6) | 146 | 301.6<br>171.2<br>(146.2, 197.3) | 289 | 180.5<br>(155.8, 201.9) |
| HDL-c (mg/dL)                     | 370 | 35.9<br>(30.0, 43.0)             | 300 | 35.0<br>(29.4, 42.3)             | 239 | 34.6<br>(29.6, 42.5)             | 431 | 35.9<br>(29.9, 43.0)             | 227 | 34.0<br>(28.1, 42.0)             | 208 | 30.9<br>(26.3, 35.2)             | 146 | 33.1<br>(25.7, 41.0)             | 289 | 32.4<br>(26.4, 40.2)    |
| Non-HDL-c <sup>2</sup> (mg/dL)    | 370 | 154.0<br>(132.0, 178.5)          | 300 | 147.3<br>(124.2, 169.2)          | 239 | 150.1<br>(128.3, 174.0)          | 431 | 151.3<br>(128.3, 174.8)          | 227 | 145.6<br>(116.5, 168.9)          | 208 | 141.9<br>(121.9, 167.5)          | 146 | 138.4<br>(113.1, 166.9)          | 289 | 146.1<br>(123.4, 168.9) |
| HbA1c, %                          | 370 | 5.8<br>(5.6, 6.2)                | 302 | 5.9<br>(5.6, 6.2)                | 240 | 5.8<br>(5.5, 6.1)                | 432 | 5.9<br>(5.6, 6.2)                | 227 | 5.7<br>(5.5, 5.9)                | 208 | 5.8<br>(5.5, 6.1)                | 146 | 5.7<br>(5.5, 6.0)                | 289 | 5.7<br>(5.5, 6.0)       |
| FBG (mg/dL)                       | 370 | 99.7<br>(92.3, 111.3)            | 300 | 100.2<br>(93.7, 108.6)           | 239 | 98.2<br>(91.6, 107.4)            | 431 | 101.0<br>(93.7, 111.7)           | 227 | 97.5<br>(91.5, 103.6)            | 208 | 98.4<br>(93.6, 106.1)            | 146 | 97.6<br>(92.7, 103.7)            | 289 | 98.1<br>(93.3, 105.2)   |
| 2-h PCG <sup>3</sup> (mg/dL)      | 336 | 116.3<br>(102.3, 132.2)          | 272 | 119.1<br>(105.4, 132.3)          | 219 | 114.0<br>(101.8, 129.9)          | 389 | 118.9<br>(104.4, 133.6)          | 218 | 98.8<br>(88.3, 113.2)            | 197 | 106.5<br>(93.9, 120.6)           | 141 | 101.0<br>(88.8, 116.4)           | 274 | 102.6<br>(90.8, 117.3)  |
| SBP, mmHg                         | 377 | 121.0<br>(113.5, 134.0)          | 306 | 120.3<br>(111.0, 130.5)          | 242 | 120.5<br>(110.5, 130.0)          | 441 | 121.0<br>(113.5, 133.5)          | 242 | 120.8<br>(114.0, 130.0)          | 213 | 123.0<br>(113.0, 132.5)          | 153 | 122.0<br>(114.0, 131.0)          | 302 | 122.0<br>(113.0, 131.0) |
| DBP, mmHg                         | 377 | 74.5<br>(69.0, 81.0)             | 306 | 72.0<br>(66.0, 79.0)             | 242 | 73.0<br>(67.0, 80.5)             | 441 | 73.5<br>(68.0, 80.5)             | 242 | 73.3<br>(67.0, 79.0)             | 213 | 72.5<br>(66.5, 79.0)             | 153 | 73.5<br>(67.5, 78.5)             | 302 | 72.5<br>(66.5, 80.0)    |
| Pre-hypertension <sup>4</sup> , % | 377 | 40.6                             | 306 | 36.0                             | 242 | 40.5                             | 441 | 37.4                             | 242 | 52.1                             | 213 | 48.8                             | 153 | 52.9                             | 302 | 49.3                    |
| Hypertension <sup>5</sup> , %     | 377 | 18.0                             | 306 | 19.3                             | 242 | 14.5                             | 441 | 20.9                             | 242 | 5.0                              | 213 | 9.4                              | 153 | 6.5                              | 302 | 7.3                     |
| Pre-diabetes <sup>6</sup> , %     | 370 | 32.1                             | 300 | 40.4                             | 239 | 29.7                             | 431 | 39.1                             | 227 | 31.8                             | 208 | 29.1                             | 146 | 30.7                             | 289 | 30.5                    |
| Diabetes <sup>7</sup> , %         | 370 | 17.5                             | 300 | 15.0                             | 239 | 15.7                             | 431 | 16.7                             | 227 | 5.4                              | 208 | 12.2                             | 146 | 8.5                              | 289 | 8.6                     |
| MetS <sup>8</sup> , %             | 370 | 78.7                             | 299 | 77.6                             | 239 | 75.7                             | 430 | 79.5                             | 227 | 32.2                             | 208 | 45.2                             | 146 | 34.9                             | 289 | 40.1                    |
| MetS components                   |     |                                  |     |                                  |     |                                  |     |                                  |     |                                  |     |                                  |     |                                  |     |                         |
| Central obesity, %                | 376 | 91.2                             | 307 | 88.0                             | 242 | 90.5                             | 441 | 89.4                             | 241 | 12.4                             | 213 | 30.5                             | 153 | 18.3                             | 301 | 22.2                    |
| High FBG/medication use, %        | 370 | 48.7                             | 300 | 53.3                             | 239 | 43.5                             | 431 | 54.8                             | 227 | 39.2                             | 208 | 41.4                             | 146 | 41.1                             | 289 | 39.8                    |
| High triglycerides/statin use, %  | 370 | 77.0                             | 300 | 78.3                             | 239 | 78.7                             | 431 | 77.0                             | 227 | 73.6                             | 208 | 75.5                             | 146 | 70.5                             | 289 | 76.5                    |
| Low HDL-c, %                      | 370 | 87.8                             | 300 | 88.0                             | 239 | 89.1                             | 431 | 87.2                             | 227 | 67.0                             | 208 | 80.8                             | 146 | 71.2                             | 289 | 74.7                    |
| High BP/medication use, %         | 377 | 36.6                             | 306 | 33.3                             | 242 | 30.6                             | 441 | 37.6                             | 242 | 26.0                             | 213 | 32.9                             | 153 | 31.1                             | 302 | 28.8                    |

Values presented are medians (25<sup>th</sup>, 75<sup>th</sup> percentiles) or percents.

1. Obesity defined as BMI  $\geq 30$  kg/m<sup>2</sup>.
2. Non-HDL-c defined as LDL-c + IDL-c + VLDL.
3. Meal challenge limited to participants without known diabetes and who had fasting blood glucose <180 mg/dL.
4. Pre-hypertension defined as systolic blood pressure 120-139 mmHg and/or diastolic blood pressure 80-89 mmHg among participants without hypertension medication use.

5. Hypertension defined according to the Seventh report of the Joint National Committee on Prevention, Detection, Evaluation, and Treatment of High Blood Pressure: systolic blood pressure  $\geq 140$  mmHg and/or diastolic blood pressure  $\geq 90$  mmHg and/or hypertension medication use.
6. Pre-diabetes defined according to the American Diabetes Association diagnostic criteria: fasting plasma glucose 100-125 mg/dL and/or 2-hour post challenge glucose 140-199 mg/dL among participants not reporting diabetes medication use.
7. Diabetes defined according to the American Diabetes Association diagnostic criteria: fasting plasma glucose  $\geq 126$  mg/dL, and/or 2-h post-challenge glucose  $\geq 200$  mg/dL, and/or diabetes medication use.
8. Metabolic syndrome defined according to 2005 NCEP ATP III diagnostic criteria based on presence  $\geq 3$  of the following: central obesity (waist circumference  $> 88$  cm for women and  $> 102$  cm for men); fasting plasma glucose  $\geq 110$  mg/dL or medication; triglycerides  $\geq 150$  mg/dL or medication; HDL-c  $< 50$  mg/dL for women and  $< 40$  mg/dL for men; and blood pressure  $\geq 130$  mmHg systolic,  $\geq 85$  mmHg diastolic and/or medication use.

Abbreviations: ADA, American Diabetes Association; DBP, diastolic blood pressure; BMI, body mass index; FBG, fasting blood glucose; HDL-c, high density lipoprotein cholesterol; IDL, intermediate density lipoprotein; INCAP, Institute of Nutrition for Central America and Panama; LDL-c, low density lipoprotein cholesterol; NCEP ATP III, National Cholesterol Education Program Adult Treatment Panel III; MetS, metabolic syndrome; PCG, post-challenge glucose; SBP, systolic blood pressure; SES, socioeconomic status; TC, total cholesterol.

**Supplemental Table 3. Selected Characteristics of the Study Population, by Supplement Type and Age at Exposure to the Intervention, for men and women. INCAP Nutrition Supplementation Trial Longitudinal Cohort, Guatemala, 1969-2017**

|                                   | Pooled |                      |        |                      |                                                             |                      |                                          |                      |
|-----------------------------------|--------|----------------------|--------|----------------------|-------------------------------------------------------------|----------------------|------------------------------------------|----------------------|
|                                   | Atole  |                      | Fresco |                      | Exposed to Intervention During Full Period Conception – 2 y |                      | Other Timing of Exposure to Intervention |                      |
|                                   | n      |                      | n      |                      | n                                                           |                      | n                                        |                      |
| Age at follow-up, y               | 619    | 45.0 (41.0, 49.0)    | 520    | 45.0 (41.5, 48.0)    | 395                                                         | 43.0 (42.0, 44.0)    | 744                                      | 47.0 (41.0, 50.0)    |
| Childhood household SES           | 619    | -0.01 (-0.51, 0.46)  | 520    | -0.07 (-0.71, 0.55)  | 395                                                         | 0.02 (-0.50, 0.55)   | 744                                      | -0.02 (-0.56, 0.22)  |
| Maternal age, y                   | 613    | 26.0 (21.0, 32.0)    | 506    | 26.0 (21.0, 32.0)    | 391                                                         | 26.0 (21.0, 32.0)    | 728                                      | 26.0 (21.0, 32.0)    |
| Maternal height, cm               | 479    | 148.7 (145.9, 152.7) | 421    | 148.7 (145.2, 151.8) | 354                                                         | 148.9 (145.8, 152.2) | 546                                      | 148.5 (145.2, 152.4) |
| Maternal schooling, y             | 608    | 0.0 (0.0, 2.0)       | 490    | 1.0 (0.0, 3.0)       | 389                                                         | 1.0 (0.0, 2.0)       | 709                                      | 0.0 (0.0, 2.0)       |
| Residing in Guatemala City, %     | 619    | 17.1                 | 520    | 19.6                 | 395                                                         | 17.2                 | 744                                      | 18.8                 |
| SES tertile, %                    | 619    |                      | 520    |                      | 395                                                         |                      | 744                                      |                      |
| Poorest                           |        | 35.4                 |        | 30.4                 |                                                             | 34.4                 |                                          | 32.5                 |
| Middle                            |        | 29.4                 |        | 37.3                 |                                                             | 30.1                 |                                          | 34.5                 |
| Wealthiest                        |        | 35.1                 |        | 32.3                 |                                                             | 35.4                 |                                          | 32.9                 |
| Total grades completed            | 606    | 3.0 (2.0, 6.0)       | 498    | 6.0 (3.0, 6.0)       | 394                                                         | 5.0 (2.0, 6.0)       | 710                                      | 4.0 (2.0, 6.0)       |
| Height, cm                        | 617    | 155.6 (150.8, 162.1) | 520    | 155.1 (149.8, 162.8) | 395                                                         | 155.3 (149.6, 162.7) | 742                                      | 155.4 (150.4, 162.5) |
| BMI, kg/m <sup>2</sup>            | 617    | 27.6 (24.5, 30.8)    | 520    | 27.9 (25.0, 31.8)    | 395                                                         | 28.0 (24.8, 30.8)    | 742                                      | 27.5 (24.7, 31.1)    |
| Obesity <sup>1</sup> , %          | 617    | 29.2                 | 520    | 34.6                 | 395                                                         | 30.9                 | 744                                      | 32.1                 |
| Waist circumference, cm           | 617    | 96.5 (90.1, 104.5)   | 520    | 98.5 (91.6, 107.3)   | 395                                                         | 97.5 (90.5, 105.5)   | 742                                      | 97.4 (90.6, 105.5)   |
| Waist-height ratio                | 617    | 0.62 (0.57, 0.68)    | 520    | 0.63 (0.58, 0.69)    | 395                                                         | 0.63 (0.57, 0.69)    | 742                                      | 0.62 (0.58, 0.68)    |
| Body fat, %                       | 592    | 37.8 (29.3, 43.2)    | 505    | 38.5 (31.8, 44.2)    | 384                                                         | 38.2 (30.9, 43.8)    | 713                                      | 37.8 (30.7, 43.7)    |
| Triglycerides (mg/dL)             | 597    | 203.3 (150.5, 283.1) | 508    | 204.1 (151.1, 276.2) | 385                                                         | 198.3 (150.5, 275.7) | 720                                      | 204.4 (151.3, 279.5) |
| TC (mg/dL)                        | 597    | 186.9 (162.2, 213.0) | 508    | 180.8 (155.8, 203.8) | 385                                                         | 181.6 (155.7, 206.3) | 720                                      | 184.9 (161.1, 210.6) |
| HDL-c (mg/dL)                     | 597    | 35.4 (29.3, 42.7)    | 508    | 32.9 (27.1, 40.5)    | 385                                                         | 33.9 (28.5, 41.9)    | 720                                      | 34.9 (28.4, 42.0)    |
| Non-HDL-c <sup>2</sup> (mg/dL)    | 597    | 150.6 (125.2, 174.8) | 508    | 146.1 (123.7, 168.3) | 385                                                         | 147.2 (122.9, 169.4) | 720                                      | 149.9 (126.0, 172.9) |
| HbA1c, %                          | 597    | 5.8 (5.5, 6.1)       | 510    | 5.8 (5.6, 6.1)       | 386                                                         | 5.8 (5.5, 6.0)       | 721                                      | 5.8 (5.6, 6.1)       |
| FBG (mg/dL)                       | 597    | 98.7 (91.8, 107.4)   | 508    | 99.4 (93.7, 107.5)   | 385                                                         | 98.0 (91.8, 105.5)   | 720                                      | 99.5 (93.5, 108.8)   |
| 2-h PCG <sup>3</sup> (mg/dL)      | 554    | 109.0 (95.2, 124.1)  | 469    | 114.3 (100.3, 128.3) | 360                                                         | 110.0 (96.6, 123.3)  | 663                                      | 112.0 (98.4, 126.9)  |
| SBP, mmHg                         | 619    | 121.0 (113.5, 131.5) | 519    | 121.0 (112.0, 131.5) | 395                                                         | 121.0 (112.5, 130.5) | 743                                      | 121.0 (113.5, 132.0) |
| DBP, mmHg                         | 619    | 74.0 (68.0, 80.5)    | 519    | 72.0 (66.0, 79.0)    | 395                                                         | 73.0 (67.0, 80.0)    | 743                                      | 73.0 (67.0, 80.0)    |
| Pre-hypertension <sup>4</sup> , % | 619    | 45.1                 | 519    | 41.2                 | 395                                                         | 45.3                 | 743                                      | 42.3                 |
| Hypertension <sup>5</sup> , %     | 619    | 12.9                 | 519    | 15.2                 | 395                                                         | 11.4                 | 743                                      | 15.3                 |
| Pre-diabetes <sup>6</sup> , %     | 597    | 32.0                 | 520    | 35.8                 | 385                                                         | 30.1                 | 720                                      | 35.6                 |
| Diabetes <sup>7</sup> , %         | 597    | 12.8                 | 520    | 13.9                 | 385                                                         | 12.9                 | 720                                      | 13.4                 |
| MetS <sup>8</sup> , %             | 597    | 61.0                 | 507    | 64.3                 | 385                                                         | 60.3                 | 719                                      | 63.7                 |
| MetS components                   |        |                      |        |                      |                                                             |                      |                                          |                      |
| Central obesity, %                | 617    | 60.4                 | 520    | 64.4                 | 395                                                         | 62.5                 | 744                                      | 62.1                 |
| High FBG/medication use, %        | 597    | 45.1                 | 508    | 48.4                 | 385                                                         | 42.6                 | 720                                      | 48.8                 |
| High triglycerides/statin use, %  | 597    | 75.7                 | 508    | 77.2                 | 385                                                         | 75.6                 | 720                                      | 76.8                 |
| Low HDL-c, %                      | 597    | 79.9                 | 508    | 85.0                 | 385                                                         | 82.3                 | 720                                      | 82.2                 |
| High BP/medication use, %         | 619    | 32.5                 | 519    | 33.1                 | 395                                                         | 30.4                 | 743                                      | 34.1                 |

Values presented are medians (25<sup>th</sup>, 75<sup>th</sup> percentiles) or percents.

1. Obesity defined as BMI  $\geq 30$  kg/m<sup>2</sup>.
2. Non-HDL-c defined as LDL-c + IDL-c + VLDL.
3. Meal challenge limited to participants without known diabetes and who had fasting blood glucose <180 mg/dL.

4. Pre-hypertension defined as systolic blood pressure 120-139 mmHg and/or diastolic blood pressure 80-89 mmHg among participants without hypertension medication use.
5. Hypertension defined according to the Seventh report of the Joint National Committee on Prevention, Detection, Evaluation, and Treatment of High Blood Pressure: systolic blood pressure  $\geq 140$  mmHg and/or diastolic blood pressure  $\geq 90$  mmHg and/or hypertension medication use.
6. Pre-diabetes defined according to the American Diabetes Association diagnostic criteria: fasting plasma glucose 100-125 mg/dL and/or 2-hour post challenge glucose 140-199 mg/dL among participants not reporting diabetes medication use.
7. Diabetes defined according to the American Diabetes Association diagnostic criteria: fasting plasma glucose  $\geq 126$  mg/dL, and/or 2-h post-challenge glucose  $\geq 200$  mg/dL, and/or diabetes medication use.
8. Metabolic syndrome defined according to 2005 NCEP ATP III diagnostic criteria based on presence  $\geq 3$  of the following: central obesity (waist circumference  $>88$  cm for women and  $>102$  cm for men); fasting plasma glucose  $\geq 110$  mg/dL or medication; triglycerides  $\geq 150$  mg/dL or medication; HDL-c  $<50$  mg/dL for women and  $<40$  mg/dL for men; and blood pressure  $\geq 130$  mmHg systolic,  $\geq 85$  mmHg diastolic and/or medication use.

Abbreviations: ADA, American Diabetes Association; DBP, diastolic blood pressure; BMI, body mass index; FBG, fasting blood glucose; HDL-c, high density lipoprotein cholesterol; IDL, intermediate density lipoprotein; INCAP, Institute of Nutrition for Central America and Panama; LDL-c, low density lipoprotein cholesterol; NCEP ATP III, National Cholesterol Education Program Adult Treatment Panel III; MetS, metabolic syndrome; PCG, post-challenge glucose; SBP, systolic blood pressure; SES, socioeconomic status; TC, total cholesterol.

**Supplemental Table 4. Multivariate generalized linear regression difference-in-difference models to predict cardio-metabolic risk factors in 2015-17 based on exposure to Atole from conception to age 2 y in the INCAP Nutrition Supplementation Trial Longitudinal Cohort (n=684 women, n=455 men)<sup>1</sup>.**

| Cardio-metabolic risk factor   |         | Women   |               |     | Men     |               |       | Pooled             |               |      |
|--------------------------------|---------|---------|---------------|-----|---------|---------------|-------|--------------------|---------------|------|
|                                |         | $\beta$ | 95% CI        | P   | $\beta$ | 95% CI        | P     | $\beta$            | 95% CI        | P    |
| BMI, kg/m <sup>2</sup>         |         |         |               |     |         |               |       |                    |               |      |
|                                | Model 1 | 1.40    | -0.30, 3.10   | 0.1 | 0.93    | -0.73, 2.60   | 0.2   | 1.23               | 0.003, 2.46   | 0.04 |
|                                | Model 2 | 1.30    | -0.40, 3.00   | 0.1 | 0.99    | -0.69, 2.66   | 0.2   | 1.26               | 0.04, 2.49    | 0.04 |
|                                | Model 3 | 1.35    | -0.33, 3.03   | 0.1 | 1.19    | -0.41, 2.80   | 0.1   | 1.29               | 0.08, 2.50    | 0.03 |
| Waist circumference, cm        |         |         |               |     |         |               |       |                    |               |      |
|                                | Model 1 | 2.29    | -1.67, 6.25   | 0.2 | 2.81    | -1.37, 7.00   | 0.1   | 2.59               | -0.34, 5.52   | 0.08 |
|                                | Model 2 | 2.41    | -1.55, 6.37   | 0.2 | 2.84    | -1.40, 7.07   | 0.1   | 2.84               | -0.08, 5.77   | 0.05 |
|                                | Model 3 | 2.52    | -1.40, 6.44   | 0.2 | 3.22    | -0.88, 7.33   | 0.1   | 2.86               | -0.04, 5.77   | 0.05 |
| Waist-height ratio             |         |         |               |     |         |               |       |                    |               |      |
|                                | Model 1 | 0.02    | -0.006, 0.04  | 0.1 | 0.01    | -0.01, 0.03   | 0.4   | 0.02               | -0.002, 0.03  | 0.08 |
|                                | Model 2 | 0.02    | -0.009, 0.04  | 0.1 | 0.01    | -0.01, 0.03   | 0.4   | 0.01               | -0.003, 0.03  | 0.1  |
|                                | Model 3 | 0.02    | -0.007, 0.04  | 0.1 | 0.01    | -0.01, 0.04   | 0.3   | 0.02               | -0.003, 0.03  | 0.09 |
| Body fat, %                    |         |         |               |     |         |               |       |                    |               |      |
|                                | Model 1 | 1.13    | -0.72, 2.98   | 0.2 | 2.32    | -0.34, 4.99   | 0.08  | 1.64               | 0.09, 3.18    | 0.03 |
|                                | Model 2 | 1.21    | -0.66, 3.07   | 0.2 | 2.30    | -0.39, 4.99   | 0.09  | 1.72               | 0.18, 3.27    | 0.02 |
|                                | Model 3 | 1.24    | -0.46, 3.27   | 0.1 | 2.55    | -0.02, 5.11   | 0.05  | 1.73               | 0.20, 3.26    | 0.02 |
| Triglycerides, mg/dL           |         |         |               |     |         |               |       |                    |               |      |
|                                | Model 1 | -1.15   | -36.49, 34.19 | 0.9 | 25.96   | -38.08, 90.01 | 0.4   | 9.28               | -23.54, 42.09 | 0.5  |
|                                | Model 2 | -2.60   | -36.83, 31.64 | 0.8 | 27.91   | -36.80, 92.61 | 0.4   | 9.29               | -22.94, 41.54 | 0.5  |
|                                | Model 3 | -2.45   | -36.55, 31.66 | 0.8 | 28.04   | -35.79, 91.88 | 0.7   | 9.29               | -22.94, 41.54 | 0.5  |
|                                | Model 4 | -5.42   | -38.95, 28.10 | 0.7 | 10.49   | -48.47, 69.46 |       | 2.27               | -28.78, 33.32 | 0.8  |
| Total cholesterol, mg/dL       |         |         |               |     |         |               |       |                    |               |      |
|                                | Model 1 | 2.56    | -9.62, 14.74  | 0.6 | 18.64   | 3.05, 32.22   | 0.01  | 9.07               | -0.51, 18.66  | 0.06 |
|                                | Model 2 | 4.53    | -7.55, 16.60  | 0.4 | 18.81   | 3.57, 34.05   | 0.01  | 10.21              | 0.69, 19.73   | 0.03 |
|                                | Model 3 | 4.48    | -7.37, 16.33  | 0.4 | 20.91   | 6.25, 35.58   | 0.005 | 10.54              | 1.19, 19.88   | 0.02 |
|                                | Model 4 | 4.32    | -7.51, 16.15  | 0.4 | 19.69   | 5.20, 34.17   | 0.007 | 10.10              | 0.80, 19.40   | 0.03 |
| HDL-c, mg/dL                   |         |         |               |     |         |               |       |                    |               |      |
|                                | Model 1 | -1.08   | -4.57, 2.41   | 0.5 | -1.38   | -5.56, 2.80   | 0.5   | -1.27              | -3.95, 1.41   | 0.3  |
|                                | Model 2 | -0.47   | -4.02, 3.07   | 0.7 | -1.70   | -5.86, 2.46   | 0.4   | -1.19              | -3.90, 1.51   | 0.3  |
|                                | Model 3 | -0.56   | -4.05, 2.92   | 0.7 | -1.53   | -5.55, 2.49   | 0.4   | -1.14              | -3.82, 1.54   | 0.4  |
|                                | Model 4 | -0.02   | -3.38, 3.33   | 0.9 | -0.15   | -3.91, 3.61   | 0.9   | -0.31              | -2.86, 2.24   | 0.8  |
| Non-HDL-c <sup>2</sup> , mg/dL |         |         |               |     |         |               |       |                    |               |      |
|                                | Model 1 | 3.64    | -7.90, 15.18  | 0.5 | 20.01   | 4.51, 35.51   | 0.01  | 10.35 <sup>†</sup> | 1.08, 19.61   | 0.02 |
|                                | Model 2 | 5.00    | -6.43, 16.43  | 0.3 | 20.51   | 5.34, 35.68   | 0.008 | 11.40              | 2.22, 20.59   | 0.01 |
|                                | Model 3 | 5.04    | -5.23, 16.31  | 0.3 | 22.45   | 8.02, 36.87   | 0.002 | 11.67              | 2.64, 20.70   | 0.01 |
|                                | Model 4 | 4.34    | -6.86, 15.55  | 0.4 | 19.84   | 5.86, 33.82   | 0.005 | 10.41 <sup>†</sup> | 1.51, 19.31   | 0.02 |
| HbA1c, %                       |         |         |               |     |         |               |       |                    |               |      |
|                                | Model 1 | -0.20   | -0.68, 0.28   | 0.4 | 0.05    | -0.47, 0.56   | 0.8   | -0.09              | -0.44, 0.27   | 0.6  |
|                                | Model 2 | -0.23   | -0.71, 0.25   | 0.3 | 0.05    | -0.47, 0.56   | 0.8   | -0.10              | -0.45, 0.26   | 0.5  |
|                                | Model 3 | -0.23   | -0.70, 0.25   | 0.3 | 0.06    | -0.43, 0.56   | 0.7   | -0.09              | -0.45, 0.26   | 0.6  |



|                                   |                               |         |              |             |        |               |             |                    |              |             |
|-----------------------------------|-------------------------------|---------|--------------|-------------|--------|---------------|-------------|--------------------|--------------|-------------|
| Fasting glucose, mg/dL            | Model 4                       | -0.24   | -0.71, 0.23  | 0.3         | 0.0001 | -0.47, 0.47   | 0.9         | -0.12              | -0.47, 0.22  | 0.4         |
|                                   | Model 1                       | -7.12   | -20.88, 6.65 | 0.3         | 3.65   | -9.39, 16.68  | 0.5         | -2.12              | -12.14, 7.90 | 0.6         |
|                                   | Model 2                       | -7.66   | -21.44, 6.13 | 0.2         | 3.49   | -9.73, 16.72  | 0.6         | -2.58              | -12.58, 7.42 | 0.6         |
|                                   | Model 3                       | -7.48   | -21.21, 6.24 | 0.2         | 3.92   | -8.93, 16.78  | 0.5         | -2.53              | -12.49, 7.42 | 0.6         |
|                                   | Model 4                       | -7.70   | -21.33, 5.93 | 0.2         | 2.21   | -9.68, 14.11  | 0.7         | -3.11              | -12.85, 6.63 | 0.5         |
| 2-h post-challenge glucose, mg/dL | Model 1                       | 0.09    | -8.38, 8.56  | 0.9         | 12.36  | -23.30, -1.42 | 0.02        | -4.86 <sup>†</sup> | -11.70, 1.98 | 0.1         |
|                                   | Model 2                       | 0.65    | -8.00, 9.30  | 0.8         | 11.85  | -22.93, -0.78 | 0.03        | -4.43 <sup>†</sup> | -11.26, 2.40 | 0.2         |
|                                   | Model 3                       | 0.82    | -7.69, 8.04  | 0.8         | 12.06  | -23.07, -1.04 | 0.03        | -4.80 <sup>†</sup> | -11.60, 2.00 | 0.1         |
|                                   | Model 4                       | -0.19   | -8.63, 8.24  | 0.9         | 13.10  | -23.64, -2.56 | 0.01        | -5.84 <sup>†</sup> | -12.51, 0.83 | 0.08        |
|                                   | Systolic blood pressure, mmHg | Model 1 | 3.52         | -1.95, 9.00 | 0.2    | 1.53          | -3.61, 6.68 | 0.5                | 2.79         | -1.01, 6.69 |
| Model 2                           |                               | 3.55    | -1.97, 9.06  | 0.2         | 1.82   | -3.31, 6.95   | 0.4         | 2.81               | -1.09, 6.72  | 0.1         |
| Model 3                           |                               | 3.54    | -1.95, 9.03  | 0.2         | 2.40   | -2.67, 7.46   | 0.3         | 2.89               | -0.99, 6.78  | 0.1         |
| Model 4                           |                               | 2.86    | -2.52, 8.25  | 0.2         | 0.90   | -3.90, 5.69   | 0.7         | 1.98               | -1.80, 5.77  | 0.3         |
| Diastolic blood pressure, mmHg    |                               | Model 1 | 1.32         | -2.07, 4.71 | 0.4    | 2.43          | -0.97, 5.84 | 0.1                | 1.85         | -0.61, 4.32 |
|                                   | Model 2                       | 1.54    | -1.86, 4.95  | 0.3         | 2.69   | -0.70, 6.09   | 0.1         | 2.06               | -0.40, 4.52  | 0.1         |
|                                   | Model 3                       | 1.61    | -1.72, 4.94  | 0.3         | 3.50   | 0.20, 6.79    | 0.03        | 2.28               | -0.14, 4.69  | 0.06        |
|                                   | Model 4                       | 1.06    | -2.18, 4.30  | 0.5         | 2.49   | -0.66, 5.64   | 0.1         | 1.59               | -0.74, 3.92  | 0.1         |

- Sample sizes were 683 and 454 (BMI, waist circumference, waist-height ratio), 662 and 435 (body fat percentage), 670 and 435 (triglycerides, total cholesterol, HDL-c, non-HDL-c, fasting blood glucose), 672 and 435 (HbA1c), 608 and 415 (2-h post-challenge glucose), and 683 and 455 (systolic and diastolic blood pressure) for women and men, respectively. Estimates are the coefficients for the interaction term specifying exposure to *Atole* from conception to age 2 y controlling for: fixed effects of birth village and treatment assignment (*Atole* vs. *Fresco*), age at intervention (exposed for full period vs other) and birth year (Model 1); maternal height, age at offspring's birth, and completed grades of schooling, and SES in 1967-75 (Model 2); SES in 2015-7, completed grades of schooling, and current residence (Guatemala City vs other) (Model 3); and current BMI and waist-height ratio (Model 4). Models for systolic blood pressure and diastolic blood pressure additionally controlled for current height and hypertension medication use. Models for HbA1c, fasting blood glucose, and post-challenge glucose additionally controlled for diabetes medication use. Pooled models controlled for sex. For missing covariates, we imputed sex-specific medians for continuous variables and sex-specific modes for discrete variables. We included dummy variables, coded as 1 if the data was missing or 0 otherwise, to account for the uncertainty in the imputed covariates. Confidence intervals account for clustering at the mother level. <sup>†</sup>  $P < 0.10$  for the interaction of sex and exposure to *Atole* from conception to age 2 y.
- Non-HDL-c defined as LDL-c + IDL + VLDL.

Abbreviations: CI, confidence interval; HbA1c, glycated hemoglobin; IDL, intermediate density lipoprotein; INCAP, Institute of Nutrition for Central America and Panama; SES, socioeconomic status.

**Supplemental Table 5. Multivariate binomial logistic difference-in-difference regression predicting obesity, hypertension, diabetes, and metabolic syndrome in 2015-17 based on *Atole* exposure from conception to age 2 y in the INCAP Nutrition Supplementation Trial Longitudinal Cohort (n=684 women, n=455 men) <sup>1</sup>.**

| Cardio-metabolic risk factor    |         | Women                                                                                                |      |                | Men                                                                                                  |      |                | Pooled                                                                                               |      |                |
|---------------------------------|---------|------------------------------------------------------------------------------------------------------|------|----------------|------------------------------------------------------------------------------------------------------|------|----------------|------------------------------------------------------------------------------------------------------|------|----------------|
|                                 |         | Difference-in-difference estimates for exposure to <i>Atole</i> from conception to age 2 y vs. other |      |                | Difference-in-difference estimates for exposure to <i>Atole</i> from conception to age 2 y vs. other |      |                | Difference-in-difference estimates for exposure to <i>Atole</i> from conception to age 2 y vs. other |      |                |
|                                 |         | Odds Ratio (95% CI)                                                                                  | P    | C <sup>2</sup> | Odds Ratio (95% CI)                                                                                  | P    | C <sup>2</sup> | Odds Ratio (95% CI)                                                                                  | P    | C <sup>2</sup> |
| Obesity <sup>3</sup>            | Model 1 | 1.84 (0.96, 3.53)                                                                                    | 0.06 | 0.56           | 1.40 (0.47, 4.20)                                                                                    | 0.5  | 0.64           | 1.83 (1.06, 3.17)                                                                                    | 0.03 | 0.65           |
|                                 | Model 2 | 1.85 (0.95, 3.57)                                                                                    | 0.06 | 0.58           | 1.45 (0.47, 4.48)                                                                                    | 0.5  | 0.67           | 1.91 (1.10, 3.33)                                                                                    | 0.02 | 0.66           |
|                                 | Model 3 | 1.88 (0.97, 3.66)                                                                                    | 0.06 | 0.61           | 1.86 (0.56, 6.18)                                                                                    | 0.3  | 0.72           | 1.94 (1.11, 3.40)                                                                                    | 0.01 | 0.68           |
| Diabetes <sup>4</sup>           | Model 1 | 0.53 (0.22, 1.27)                                                                                    | 0.1  | 0.63           | 0.17 (0.03, 0.98)                                                                                    | 0.04 | 0.68           | 0.43 (0.20, 0.91)                                                                                    | 0.02 | 0.65           |
|                                 | Model 2 | 0.51 (0.21, 1.26)                                                                                    | 0.1  | 0.65           | 0.16 (0.03, 1.02)                                                                                    | 0.05 | 0.74           | 0.44 (0.21, 0.93)                                                                                    | 0.02 | 0.66           |
|                                 | Model 3 | - <sup>6</sup>                                                                                       | -    | -              | 0.16 (0.02, 0.99)                                                                                    | 0.04 | 0.78           | 0.45 (0.21, 0.96)                                                                                    | 0.03 | 0.68           |
|                                 | Model 4 | -                                                                                                    | -    | -              | 0.17 (0.03, 1.09)                                                                                    | 0.06 | 0.79           | 0.46 (0.21, 0.97)                                                                                    | 0.04 | 0.70           |
| Hypertension <sup>5</sup>       | Model 1 | 1.12 (0.47, 2.67)                                                                                    | 0.7  | 0.64           | 2.21 (0.47, 10.48)                                                                                   | 0.3  | 0.65           | 1.25 (0.58, 2.68)                                                                                    | 0.5  | 0.69           |
|                                 | Model 2 | 1.16 (0.48, 2.82)                                                                                    | 0.7  | 0.66           | 2.83 (0.57, 14.02)                                                                                   | 0.2  | 0.71           | 1.29 (0.59, 2.82)                                                                                    | 0.5  | 0.70           |
|                                 | Model 3 | 1.17 (0.48, 2.85)                                                                                    | 0.7  | 0.69           | 3.31 (0.61, 17.75)                                                                                   | 0.1  | 0.74           | 1.35 (0.61, 2.97)                                                                                    | 0.4  | 0.71           |
|                                 | Model 4 | 1.15 (0.47, 2.80)                                                                                    | 0.7  | 0.73           | 3.06 (0.45, 20.89)                                                                                   | 0.2  | 0.81           | 1.31 (0.59, 2.91)                                                                                    | 0.5  | 0.76           |
| Metabolic syndrome <sup>6</sup> | Model 1 | 1.49 (0.69, 3.21)                                                                                    | 0.3  | 0.64           | 0.93 (0.40, 2.16)                                                                                    | 0.8  | 0.60           | 1.24 (0.70, 2.18)                                                                                    | 0.4  | 0.74           |
|                                 | Model 2 | 1.43 (0.66, 3.12)                                                                                    | 0.3  | 0.61           | 1.04 (0.44, 2.46)                                                                                    | 0.9  | 0.64           | 1.27 (0.71, 2.26)                                                                                    | 0.4  | 0.74           |
|                                 | Model 3 | 1.48 (0.60, 3.26)                                                                                    | 0.3  | 0.65           | 1.15 (0.47, 2.79)                                                                                    | 0.7  | 0.68           | 1.27 (0.71, 2.27)                                                                                    | 0.4  | 0.75           |
|                                 | Model 4 | 1.22 (0.55, 2.72)                                                                                    | 0.6  | 0.77           | 0.59 (0.19, 1.82)                                                                                    | 0.3  | 0.86           | 0.88 (0.47, 1.65)                                                                                    | 0.6  | 0.86           |

- Sample sizes were 670 and 435 (diabetes) 683 and 455 (hypertension), and 669 and 435 (metabolic syndrome) for women and men, respectively. Estimates are odds ratios and 95% confidence intervals for the interaction term specifying exposure to *Atole* from conception to age 2 y controlling for: fixed effects of birth village and treatment assignment (*Atole* vs. *Fresco*), age at intervention (exposed for full period vs other) and birth year (Model 1); maternal height, age at offspring's birth, and completed grades of schooling, and SES in 1967-75 (Model 2) SES in 2015-7, completed grades of schooling, and current residence (Guatemala City vs other) (Model 3); and current BMI and waist-height ratio (Model 4). Models for hypertension and metabolic syndrome additionally controlled for current height. Pooled models controlled for sex. For missing covariates, we imputed sex-specific medians for continuous variables and sex-specific modes for discrete variables. We included dummy variables, coded as 1 if the data was missing or 0 otherwise, to account for the uncertainty in the imputed covariates. Confidence intervals account for clustering at the mother level.
- C statistic values >0.70 indicate good model fit.
- Obesity defined as BMI  $\geq 30$  kg/m<sup>2</sup>.
- Diabetes defined according to the American Diabetes Association diagnostic criteria: fasting plasma glucose  $\geq 126$  mg/dL, and/or post-challenge glucose  $\geq 200$  mg/dL, and/or diabetes medication use.
- Hypertension defined according to the Seventh report of the Joint National Committee on Prevention, Detection, Evaluation, and Treatment of High Blood Pressure: systolic blood pressure  $\geq 140$  mmHg and/or diastolic blood pressure  $\geq 90$  mmHg and/or hypertension medication use.

6. Metabolic syndrome defined according to 2005 NCEP ATP III diagnostic criteria as presence of  $\geq 3$  of: central obesity (waist circumference  $>88$  cm for women and  $>102$  cm for men); fasting plasma glucose  $\geq 110$  mg/dL or diabetes medication use; triglycerides  $\geq 150$  mg/dL or lipid medication use; HDL-c  $<50$  mg/dL (women) and  $<40$  mg/dL (men); and blood pressure  $\geq 130$  mmHg systolic,  $\geq 85$  mmHg diastolic and/or hypertension medication use.
7. - Maximum likelihood estimation resulted in a non-positive definite solution.

Abbreviations: ADA, American Diabetes Association; CI, confidence interval; INCAP, Institute of Nutrition for Central America and Panama; NCEP ATP III, National Cholesterol Education Program Adult Treatment Panel III; SES, socioeconomic status.

**Supplemental Table 6. Multivariate binomial logistic difference-in-difference regression models predicting metabolic syndrome components in 2015-17 based on *Atole* exposure from conception to age 2 y in the INCAP Nutrition Supplementation Trial Longitudinal Cohort (n=684 women, n=455 men) <sup>1</sup>.**

| Cardio-metabolic risk factor                                   |         | Women                                                                                                |      |                | Men                                                                                                  |     |                | Pooled                                                                                               |      |                |
|----------------------------------------------------------------|---------|------------------------------------------------------------------------------------------------------|------|----------------|------------------------------------------------------------------------------------------------------|-----|----------------|------------------------------------------------------------------------------------------------------|------|----------------|
|                                                                |         | Difference-in-difference estimates for exposure to <i>Atole</i> from conception to age 2 y vs. other |      |                | Difference-in-difference estimates for exposure to <i>Atole</i> from conception to age 2 y vs. other |     |                | Difference-in-difference estimates for exposure to <i>Atole</i> from conception to age 2 y vs. other |      |                |
|                                                                |         | Odds Ratio (95% CI)                                                                                  | P    | C <sup>2</sup> | Odds Ratio (95% CI)                                                                                  | P   | C <sup>2</sup> | Odds Ratio (95% CI)                                                                                  | P    | C <sup>2</sup> |
| Central obesity <sup>3</sup>                                   | Model 1 | 2.60 (0.86, 7.86)                                                                                    | 0.08 | 0.60           | 2.06 (0.74, 5.76)                                                                                    | 0.1 | 0.67           | 2.36 (1.12, 4.98)                                                                                    | 0.02 | 0.87           |
|                                                                | Model 2 | 2.44 (0.80, 7.44)                                                                                    | 0.1  | 0.64           | 2.24 (0.76, 6.61)                                                                                    | 0.1 | 0.70           | 2.52 (1.18, 5.37)                                                                                    | 0.01 | 0.88           |
|                                                                | Model 3 | 2.41 (0.77, 7.52)                                                                                    | 0.1  | 0.69           | 2.49 (0.82, 7.60)                                                                                    | 0.1 | 0.73           | 2.53 (1.18, 5.43)                                                                                    | 0.01 | 0.89           |
| Elevated fasting plasma glucose or medication use <sup>4</sup> | Model 1 | 1.53 (0.80, 2.95)                                                                                    | 0.2  | 0.63           | 1.14 (0.50, 2.60)                                                                                    | 0.7 | 0.59           | 1.35 (0.81, 2.26)                                                                                    | 0.2  | 0.62           |
|                                                                | Model 2 | 1.47 (0.75, 2.89)                                                                                    | 0.2  | 0.66           | 1.15 (0.48, 2.57)                                                                                    | 0.7 | 0.60           | 1.32 (0.78, 2.22)                                                                                    | 0.2  | 0.64           |
|                                                                | Model 3 | 1.49 (0.76, 2.95)                                                                                    | 0.2  | 0.67           | 1.17 (0.50, 2.78)                                                                                    | 0.7 | 0.64           | 1.33 (0.79, 2.25)                                                                                    | 0.2  | 0.64           |
|                                                                | Model 4 | 1.43 (0.72, 2.82)                                                                                    | 0.3  | 0.69           | 1.01 (0.42, 2.45)                                                                                    | 0.9 | 0.69           | 1.24 (0.73, 2.10)                                                                                    | 0.4  | 0.67           |
| Elevated triglycerides or medication use <sup>5</sup>          | Model 1 | 1.17 (0.54, 2.54)                                                                                    | 0.6  | 0.54           | 1.92 (0.78, 4.73)                                                                                    | 0.1 | 0.56           | 1.47 (0.82, 2.62)                                                                                    | 0.1  | 0.54           |
|                                                                | Model 2 | 1.17 (0.53, 2.56)                                                                                    | 0.6  | 0.57           | - <sup>6</sup>                                                                                       | -   | -              | 1.51 (0.84, 2.72)                                                                                    | 0.1  | 0.58           |
|                                                                | Model 3 | 1.16 (0.53, 2.55)                                                                                    | 0.7  | 0.60           | -                                                                                                    | -   | -              | 1.47 (0.81, 2.67)                                                                                    | 0.2  | 0.60           |
|                                                                | Model 4 | 1.05 (0.48, 2.31)                                                                                    | 0.8  | 0.65           | -                                                                                                    | -   | -              | 1.29 (0.71, 2.35)                                                                                    | 0.4  | 0.67           |
| Low HDL-c <sup>6</sup>                                         | Model 1 | 1.32 (0.49, 3.56)                                                                                    | 0.5  | 0.57           | 1.52 (0.60, 3.86)                                                                                    | 0.3 | 0.62           | 1.43 (0.73, 2.80)                                                                                    | 0.2  | 0.65           |
|                                                                | Model 2 | - <sup>6</sup>                                                                                       | -    | -              | 1.68 (0.65, 4.34)                                                                                    | 0.2 | 0.66           | 1.44 (0.73, 2.83)                                                                                    | 0.2  | 0.66           |
|                                                                | Model 3 | -                                                                                                    | -    | -              | 1.57 (0.61, 4.08)                                                                                    | 0.3 | 0.68           | 1.38 (0.70, 2.73)                                                                                    | 0.3  | 0.68           |
|                                                                | Model 4 | -                                                                                                    | -    | -              | 1.18 (0.43, 3.28)                                                                                    | 0.6 | 0.77           | 1.10 (0.55, 2.21)                                                                                    | 0.7  | 0.75           |
| Elevated blood pressure or medication use <sup>7</sup>         | Model 1 | 1.52 (0.76, 3.04)                                                                                    | 0.2  | 0.61           | 0.70 (0.30, 1.68)                                                                                    | 0.4 | 0.59           | 1.11 (0.64, 1.89)                                                                                    | 0.7  | 0.59           |
|                                                                | Model 2 | 1.51 (0.75, 3.06)                                                                                    | 0.2  | 0.63           | 0.76 (0.31, 1.83)                                                                                    | 0.5 | 0.62           | 1.11 (0.64, 1.91)                                                                                    | 0.7  | 0.61           |
|                                                                | Model 3 | 1.56 (0.76, 3.19)                                                                                    | 0.2  | 0.66           | 0.81 (0.33, 1.98)                                                                                    | 0.6 | 0.64           | 1.15 (0.67, 2.00)                                                                                    | 0.6  | 0.63           |
|                                                                | Model 4 | 1.45 (0.71, 2.99)                                                                                    | 0.3  | 0.69           | 0.60 (0.21, 1.62)                                                                                    | 0.3 | 0.75           | 1.04 (0.59, 1.83)                                                                                    | 0.8  | 0.69           |

1. Sample sizes were 683 and 454 (central obesity), 670 and 435 (elevated fasting plasma glucose, triglycerides, HDL-c) and 683 and 455 (elevated blood pressure) for women and men, respectively. Estimates are odds ratios and 95% confidence intervals for the interaction term specifying exposure to *Atole* from conception to age 2 y controlling for: fixed effects of birth village and treatment assignment (*Atole* vs. *Fresco*), age at intervention (exposed for full period vs other) and birth year (Model 1); maternal height, age at offspring's birth, and completed grades of schooling, and SES in 1967-75 (Model 2); SES in 2015-7, completed grades of schooling, and current residence (Guatemala City vs other) (Model 3); and current BMI and waist-height ratio (Model 4). Models for elevated blood pressure additionally controlled for current height. Pooled models controlled for sex. For missing covariates, we imputed sex-specific medians for continuous variables and sex-specific modes for discrete variables. We included dummy variables, coded as 1 if the data was missing or 0 otherwise, to account for the uncertainty in the imputed covariates. Confidence intervals account for clustering at the mother level.
2. C statistic values >0.70 indicate good model fit.

3. Central obesity defined as waist circumference  $>88$  for women and  $>102$  cm for men.
4. Elevated fasting plasma glucose ( $\geq 100$  mg/dL) or diabetes medication use.
5. Elevated triglycerides defined as  $\geq 150$  mg/dL or lipid medication use.
6. Low HDL-c defined as HDL-c  $<50$  mg/dL for women and  $<40$  mg/dL for men.
7. Elevated blood pressure defined as systolic blood pressure  $\geq 130$  mmHg and/or diastolic blood pressure  $\geq 85$  mmHg and/or hypertension medication use.
8. Maximum likelihood estimation resulted in a non-positive definite solution.

Abbreviations: CI, confidence interval; HDL-c, high density lipoprotein cholesterol; INCAP, Institute of Nutrition for Central America and Panama; NCEP ATP III, National Cholesterol Education Program Adult Treatment Panel III; SES, socioeconomic status.

**Supplemental Table 7. Multivariate generalized linear difference-in-difference regression models to predict cardio-metabolic risk factors in 2015-17 based on exposure to Atole (exposure during the full period from conception to age 2 y or exposure during the partial period from conception to age 2 y versus no exposure during the period from conception to age 2 y) in the INCAP Nutrition Supplementation Trial Longitudinal Cohort (n=684 women, n=455 men)<sup>1</sup>.**

| Cardio-metabolic risk factor | Women                                                                                                                                 |               |     |                                                                                                                                          |               |     | Men                                                                                                                                   |                |       |                                                                                                                                          |                |      |
|------------------------------|---------------------------------------------------------------------------------------------------------------------------------------|---------------|-----|------------------------------------------------------------------------------------------------------------------------------------------|---------------|-----|---------------------------------------------------------------------------------------------------------------------------------------|----------------|-------|------------------------------------------------------------------------------------------------------------------------------------------|----------------|------|
|                              | Difference-in-difference estimates for exposure to Atole for full period from conception to age 2 y vs. no exposure during the period |               |     | Difference-in-difference estimates for exposure to Atole for partial period from conception to age 2 y vs. no exposure during the period |               |     | Difference-in-difference estimates for exposure to Atole for full period from conception to age 2 y vs. no exposure during the period |                |       | Difference-in-difference estimates for exposure to Atole for partial period from conception to age 2 y vs. no exposure during the period |                |      |
|                              | $\beta$                                                                                                                               | 95% CI        | P   | $\beta$                                                                                                                                  | 95% CI        | P   | $\beta$                                                                                                                               | 95% CI         | P     | $\beta$                                                                                                                                  | 95% CI         | P    |
| BMI, kg/m <sup>2</sup>       |                                                                                                                                       |               |     |                                                                                                                                          |               |     |                                                                                                                                       |                |       |                                                                                                                                          |                |      |
| Model 1                      | 1.57                                                                                                                                  | -0.44, 3.57   | 0.1 | 0.37                                                                                                                                     | -1.65, 2.39   | 0.7 | 0.44                                                                                                                                  | -1.41, 2.30    | 0.6   | -1.09                                                                                                                                    | -2.90, 0.73    | 0.2  |
| Model 2                      | 1.43                                                                                                                                  | -0.56, 3.14   | 0.1 | 0.27                                                                                                                                     | -1.71, 2.26   | 0.7 | 0.57                                                                                                                                  | -1.30, 2.44    | 0.5   | -0.92                                                                                                                                    | -2.75, 0.91    | 0.3  |
| Model 3                      | 1.50                                                                                                                                  | -0.46, 3.47   | 0.1 | 0.33                                                                                                                                     | -1.61, 2.27   | 0.7 | 0.57                                                                                                                                  | -1.21, 2.35    | 0.5   | -1.45                                                                                                                                    | -3.23, 0.33    | 0.1  |
| Waist circumference, cm      |                                                                                                                                       |               |     |                                                                                                                                          |               |     |                                                                                                                                       |                |       |                                                                                                                                          |                |      |
| Model 1                      | 3.48                                                                                                                                  | -1.21, 8.18   | 0.1 | 2.63                                                                                                                                     | -2.10, 7.36   | 0.2 | 1.71                                                                                                                                  | -2.93, 6.34    | 0.4   | -2.51                                                                                                                                    | -6.86, 1.85    | 0.2  |
| Model 2                      | 3.59                                                                                                                                  | -1.06, 8.24   | 0.1 | 2.55                                                                                                                                     | -2.09, 7.19   | 0.2 | 1.98                                                                                                                                  | -2.71, 6.67    | 0.4   | -1.90                                                                                                                                    | -6.28, 2.47    | 0.3  |
| Model 3                      | 3.68                                                                                                                                  | -0.92, 8.29   | 0.1 | 2.53                                                                                                                                     | -2.02, 7.08   | 0.2 | 1.96                                                                                                                                  | -2.53, 6.45    | 0.3   | -2.97                                                                                                                                    | -7.24, 1.30    | 0.1  |
| Waist-height ratio           |                                                                                                                                       |               |     |                                                                                                                                          |               |     |                                                                                                                                       |                |       |                                                                                                                                          |                |      |
| Model 1                      | 0.02                                                                                                                                  | -0.006, 0.05  | 0.1 | 0.01                                                                                                                                     | -0.02, 0.04   | 0.4 | 0.003                                                                                                                                 | -0.02, 0.03    | 0.8   | -0.01                                                                                                                                    | -0.04, 0.01    | 0.2  |
| Model 2                      | 0.02                                                                                                                                  | -0.008, 0.05  | 0.1 | 0.01                                                                                                                                     | -0.02, 0.04   | 0.4 | 0.004                                                                                                                                 | -0.02, 0.03    | 0.7   | -0.01                                                                                                                                    | -0.04, 0.01    | 0.3  |
| Model 3                      | 0.02                                                                                                                                  | -0.007, 0.05  | 0.1 | 0.01                                                                                                                                     | -0.02, 0.04   | 0.4 | 0.004                                                                                                                                 | -0.02, 0.03    | 0.7   | -0.02                                                                                                                                    | -0.04, 0.006   | 0.1  |
| Body fat, %                  |                                                                                                                                       |               |     |                                                                                                                                          |               |     |                                                                                                                                       |                |       |                                                                                                                                          |                |      |
| Model 1                      | 1.64                                                                                                                                  | -0.50, 3.78   | 0.1 | 1.00                                                                                                                                     | -1.35, 3.35   | 0.4 | 1.84                                                                                                                                  | -1.08, 4.76    | 0.2   | -1.07                                                                                                                                    | -3.99, 1.85    | 0.4  |
| Model 2                      | 1.69                                                                                                                                  | -0.45, 3.83   | 0.1 | 1.20                                                                                                                                     | -1.40, 3.29   | 0.4 | 1.87                                                                                                                                  | -1.04, 4.77    | 0.2   | -0.97                                                                                                                                    | -3.85, 1.90    | 0.5  |
| Model 3                      | 1.78                                                                                                                                  | -0.35, 3.91   | 0.1 | 1.06                                                                                                                                     | -1.23, 3.35   | 0.3 | 1.90                                                                                                                                  | -0.85, 4.66    | 0.1   | -1.55                                                                                                                                    | -4.43, 1.35    | 0.2  |
| Triglycerides, mg/dL         |                                                                                                                                       |               |     |                                                                                                                                          |               |     |                                                                                                                                       |                |       |                                                                                                                                          |                |      |
| Model 1                      | -2.74                                                                                                                                 | -41.87, 36.38 | 0.8 | -2.38                                                                                                                                    | -44.77, 40.01 | 0.9 | 36.12                                                                                                                                 | -37.00, 109.24 | 0.3   | 25.55                                                                                                                                    | -37.35, 88.46  | 0.4  |
| Model 2                      | -2.90                                                                                                                                 | -41.54, 35.74 | 0.8 | -0.07                                                                                                                                    | -42.18, 42.04 | 0.9 | 44.41                                                                                                                                 | -28.31, 117.14 | 0.2   | 40.49                                                                                                                                    | -23.11, 104.04 | 0.2  |
| Model 3                      | -3.36                                                                                                                                 | -41.76, 35.04 | 0.8 | -1.33                                                                                                                                    | -43.07, 40.41 | 0.9 | 44.59                                                                                                                                 | -27.61, 116.79 | 0.2   | 40.14                                                                                                                                    | -28.32, 108.60 | 0.2  |
| Model 4                      | -6.47                                                                                                                                 | -44.53, 31.58 | 0.7 | -1.55                                                                                                                                    | -43.35, 40.25 | 0.9 | 34.87                                                                                                                                 | -32.84, 102.58 | 0.3   | 58.30                                                                                                                                    | -8.05, 124.65  | 0.08 |
| Total cholesterol, mg/dL     |                                                                                                                                       |               |     |                                                                                                                                          |               |     |                                                                                                                                       |                |       |                                                                                                                                          |                |      |
| Model 1                      | 3.35                                                                                                                                  | -10.78, 17.48 | 0.6 | 1.16                                                                                                                                     | -13.27, 15.59 | 0.8 | 21.14                                                                                                                                 | 3.61, 38.67    | 0.01  | 5.78                                                                                                                                     | -10.77, 22.34  | 0.4  |
| Model 2                      | 5.83                                                                                                                                  | -8.24, 19.89  | 0.4 | 2.32                                                                                                                                     | -12.01, 16.65 | 0.7 | 21.78                                                                                                                                 | 4.57, 38.99    | 0.01  | 6.77                                                                                                                                     | -10.05, 23.59  | 0.4  |
| Model 3                      | 6.26                                                                                                                                  | -7.69, 20.21  | 0.3 | 3.41                                                                                                                                     | -10.77, 17.59 | 0.6 | 22.05                                                                                                                                 | 5.60, 38.50    | 0.008 | 2.46                                                                                                                                     | -14.21, 19.13  | 0.7  |
| Model 4                      | 6.09                                                                                                                                  | -7.85, 20.03  | 0.3 | 3.40                                                                                                                                     | -10.82, 17.61 | 0.6 | 21.35                                                                                                                                 | 5.06, 37.64    | 0.01  | 3.72                                                                                                                                     | -13.01, 20.51  | 0.6  |
| HDL-c, mg/dL                 |                                                                                                                                       |               |     |                                                                                                                                          |               |     |                                                                                                                                       |                |       |                                                                                                                                          |                |      |
| Model 1                      | -1.33                                                                                                                                 | -5.25, 2.60   | 0.5 | -0.77                                                                                                                                    | -5.28, 3.74   | 0.7 | -0.26                                                                                                                                 | -5.10, 4.59    | 0.9   | 2.38                                                                                                                                     | -2.79, 7.54    | 0.3  |
| Model 2                      | -0.65                                                                                                                                 | -4.61, 3.30   | 0.7 | -0.57                                                                                                                                    | -5.03, 3.90   | 0.8 | -1.28                                                                                                                                 | -6.14, 3.57    | 0.6   | 0.73                                                                                                                                     | -4.45, 5.91    | 0.7  |
| Model 3                      | -0.68                                                                                                                                 | -4.59, 3.24   | 0.7 | -0.43                                                                                                                                    | -4.76, 3.89   | 0.8 | -1.28                                                                                                                                 | -6.00, 3.43    | 0.5   | 0.44                                                                                                                                     | -4.75, 5.63    | 0.8  |

|                                          |         |        |              |     |        |               |     |        |               |       |       |               |     |
|------------------------------------------|---------|--------|--------------|-----|--------|---------------|-----|--------|---------------|-------|-------|---------------|-----|
| Non-HDL-c <sup>2</sup> ,<br>mg/dL        | Model 4 | -0.04  | -3.82, 3.73  | 0.9 | -0.24  | -4.52, 4.04   | 0.9 | -0.54  | -4.90, 3.82   | 0.7   | -1.00 | -5.79, 3.80   | 0.6 |
|                                          | Model 1 | 4.68   | -8.83, 18.20 | 0.4 | 1.93   | -12.25, 16.12 | 0.7 | 21.40  | 3.99, 38.81   | 0.01  | 3.41  | -12.70, 19.51 | 0.6 |
|                                          | Model 2 | 6.48   | -7.02, 19.97 | 0.3 | 2.88   | -11.26, 17.03 | 0.6 | 23.06  | 6.09, 40.03   | 0.007 | 6.03  | -10.01, 22.08 | 0.4 |
|                                          | Model 3 | 6.93   | -6.50, 20.37 | 0.2 | 3.84   | -10.17, 17.86 | 0.5 | 23.33  | 7.26, 39.41   | 0.002 | 2.02  | -14.01, 18.04 | 0.8 |
|                                          | Model 4 | 6.14   | -7.23, 19.51 | 0.3 | 3.63   | -10.39, 17.66 | 0.6 | 21.89  | 6.23, 37.55   | 0.006 | 4.72  | -11.21, 20.64 | 0.5 |
| HbA1c, %                                 | Model 1 | -0.34  | -0.90, 0.23  | 0.2 | -0.25  | -0.85, 0.34   | 0.4 | -0.04  | -0.63, 0.54   | 0.8   | -0.21 | -0.79, 0.37   | 0.4 |
|                                          | Model 2 | -0.36  | -0.93, 0.21  | 0.2 | -0.25  | -0.85, 0.35   | 0.4 | -0.02  | -0.61, 0.56   | 0.9   | -0.16 | -0.73, 0.42   | 0.5 |
|                                          | Model 3 | -0.36  | -0.93, 0.21  | 0.2 | -0.26  | -0.86, 0.34   | 0.3 | -0.04  | -0.61, 0.54   | 0.9   | -0.23 | -0.81, 0.35   | 0.4 |
|                                          | Model 4 | -0.39  | -0.96, 0.18  | 0.1 | -0.28  | -0.88, 0.32   | 0.3 | -0.06  | -0.61, 0.49   | 0.8   | -0.15 | -0.72, 0.42   | 0.6 |
| Fasting glucose,<br>mg/dL                | Model 1 | -9.66  | -25.21, 5.89 | 0.2 | -4.18  | -20.66, 12.31 | 0.6 | 0.72   | -14.99, 16.44 | 0.9   | -6.07 | -22.29, 10.15 | 0.4 |
|                                          | Model 2 | -9.88  | -25.71, 5.95 | 0.2 | -3.82  | -20.39, 12.76 | 0.6 | 0.80   | -15.00, 16.00 | 0.9   | -5.38 | -21.26, 10.49 | 0.5 |
|                                          | Model 3 | -10.02 | -25.77, 5.73 | 0.2 | -4.34  | -20.79, 12.12 | 0.6 | 0.65   | -15.30, 16.34 | 0.9   | -7.14 | -23.20, 8.91  | 0.3 |
|                                          | Model 4 | -10.43 | -26.18, 5.32 | 0.1 | -4.78  | -21.21, 11.66 | 0.6 | -0.19  | -14.98, 14.60 | 0.9   | -5.35 | -21.02, 10.31 | 0.5 |
| 2-h post-<br>challenge<br>glucose, mg/dL | Model 1 | -1.54  | -11.70, 8.61 | 0.7 | -3.04  | -13.68, 7.59  | 0.5 | -12.30 | -24.03, -0.57 | 0.03  | -0.09 | -10.29, 10.46 | 0.9 |
|                                          | Model 2 | -0.64  | -11.09, 9.81 | 0.9 | -2.42  | -13.06, 8.23  | 0.6 | -10.88 | -22.78, 1.02  | 0.07  | 2.10  | -8.57, 12.77  | 0.6 |
|                                          | Model 3 | -0.66  | -10.97, 9.64 | 0.9 | -2.72  | -13.27, 7.83  | 0.6 | -11.04 | -22.89, 0.81  | 0.06  | 2.15  | -8.70, 13.00  | 0.6 |
|                                          | Model 4 | -2.04  | -12.28, 8.20 | 0.6 | -3.52  | -13.97, 6.93  | 0.5 | -11.39 | -22.66, -0.12 | 0.04  | 3.71  | -7.11, 14.53  | 0.5 |
| Systolic blood<br>pressure, mmHg         | Model 1 | 3.38   | -3.13, 9.89  | 0.3 | -0.21  | -6.81, 6.39   | 0.9 | 0.93   | -4.81, 6.68   | 0.7   | -1.57 | -8.05, 4.90   | 0.6 |
|                                          | Model 2 | 3.47   | -3.08, 10.02 | 0.2 | -0.12  | -6.72, 6.48   | 0.9 | 1.26   | -4.52, 7.03   | 0.6   | -1.45 | -8.12, 5.21   | 0.6 |
|                                          | Model 3 | 3.52   | -3.00, 10.04 | 0.2 | 0.05   | -6.47, 6.57   | 0.9 | 1.52   | -4.20, 7.24   | 0.6   | -2.24 | -8.87, 4.39   | 0.5 |
|                                          | Model 4 | 2.82   | -3.55, 9.19  | 0.3 | -0.009 | -6.47, 6.45   | 0.9 | 0.61   | -4.78, 6.00   | 0.8   | -0.84 | -6.98, 5.30   | 0.7 |
| Diastolic blood<br>pressure, mmHg        | Model 1 | 2.40   | -1.57, 6.37  | 0.2 | 2.25   | -1.64, 6.14   | 0.2 | 2.17   | -1.73, 6.05   | 0.2   | -0.68 | -4.90, 3.53   | 0.7 |
|                                          | Model 2 | 2.53   | -1.42, 6.48  | 0.2 | 2.05   | -1.81, 5.92   | 0.2 | 2.58   | -1.33, 6.49   | 0.1   | 0.31  | -4.62, 4.00   | 0.8 |
|                                          | Model 3 | 2.71   | -1.15, 6.58  | 0.1 | 2.35   | -1.44, 6.13   | 0.2 | 2.91   | -0.83, 6.66   | 0.1   | -1.46 | -5.64, 2.71   | 0.4 |
|                                          | Model 4 | 2.14   | -1.58, 5.86  | 0.2 | 2.28   | -1.46, 6.01   | 0.2 | 2.30   | -1.26, 5.87   | 0.2   | 0.53  | -4.37, 3.30   | 0.7 |

1. Sample sizes were 683 and 454 (BMI, waist circumference, waist-height ratio), 662 and 435 (body fat percentage), 670 and 435 (triglycerides, total cholesterol, HDL-c, non-HDL-c, fasting blood glucose), 672 and 435 (hbA1c), 608 and 415 (2-h post-challenge glucose), and 683 and 455 (systolic and diastolic blood pressure) for women and men, respectively. Estimates are the coefficients for the interaction specifying either exposure to *Atole* during the full period from conception to age 2 y or exposure to *Atole* during a partial period conception to age 2 y controlling for: fixed effects of birth village and treatment assignment (*Atole* vs. *Fresco*), age at intervention (exposed for full period vs no exposure during the period; exposed for partial period vs no exposure during the period), birth year (Model 1); maternal height, age at offspring's birth, and completed grades of schooling, and SES in 1967-75 (Model 2); SES in 2015-7, completed grades of schooling, and current residence (Guatemala City vs other) (Model 3); and current BMI and waist-height ratio (Model 4). Models for systolic blood pressure and diastolic blood pressure additionally controlled for current height and hypertension

medication use. Models for HbA1c, fasting blood glucose, and post-challenge glucose additionally controlled for diabetes medication use. For missing covariates, we imputed sex-specific medians for continuous variables and sex-specific modes for discrete variables. We included dummy variables, coded as 1 if the data was missing or 0 otherwise, to account for the uncertainty in the imputed covariates. Confidence intervals account for clustering at the mother level.

2. Non-HDL-c defined as  $LDL-c + IDL + VLDL$ .

Abbreviations: CI, confidence interval; HbA1c, glycated hemoglobin; IDL, intermediate density lipoprotein; INCAP, Institute of Nutrition for Central America and Panama; SES, socioeconomic status.



**Supplemental Table 8. Multivariate generalized linear difference-in-difference regression models to predict cardio-metabolic risk factors in 2015-17 based on exposure to Atole (exposure during the full period from conception to age 2 y or exposure during the partial period from conception to age 2 y versus no exposure during the period from conception to age 2 y) in the INCAP Nutrition Supplementation Trial Longitudinal Cohort (n=1139) <sup>1</sup>.**

| Pooled                            |         |                                                                                                                                       |               |          |                                                                                                                                          |               |          |
|-----------------------------------|---------|---------------------------------------------------------------------------------------------------------------------------------------|---------------|----------|------------------------------------------------------------------------------------------------------------------------------------------|---------------|----------|
| Cardio-metabolic risk factor      |         | Difference-in-difference estimates for exposure to Atole for full period from conception to age 2 y vs. no exposure during the period |               |          | Difference-in-difference estimates for exposure to Atole for partial period from conception to age 2 y vs. no exposure during the period |               |          |
|                                   |         | $\beta$                                                                                                                               | 95% CI        | <i>P</i> | $\beta$                                                                                                                                  | 95% CI        | <i>P</i> |
| BMI, kg/m <sup>2</sup>            | Model 1 | 1.16                                                                                                                                  | -0.25, 2.57   | 0.1      | -0.17                                                                                                                                    | -1.58, 1.24   | 0.8      |
|                                   | Model 2 | 1.16                                                                                                                                  | -0.24, 2.57   | 0.1      | -0.23                                                                                                                                    | -1.65, 1.18   | 0.7      |
|                                   | Model 3 | 1.16                                                                                                                                  | -0.22, 2.55   | 0.1      | -0.29                                                                                                                                    | -1.68, 1.10   | 0.6      |
| Waist circumference, cm           | Model 1 | 2.99                                                                                                                                  | -0.37, 6.35   | 0.08     | 0.89                                                                                                                                     | -2.46, 4.23   | 0.6      |
|                                   | Model 2 | 3.25                                                                                                                                  | -0.11, 6.61   | 0.05     | 0.89                                                                                                                                     | -2.45, 4.22   | 0.6      |
|                                   | Model 3 | 3.21                                                                                                                                  | -0.12, 6.54   | 0.05     | 0.77 <sup>†</sup>                                                                                                                        | -2.54, 4.08   | 0.6      |
| Waist-height ratio                | Model 1 | 0.02                                                                                                                                  | -0.004, 0.04  | 0.1      | 0.003                                                                                                                                    | -0.02, 0.02   | 0.7      |
|                                   | Model 2 | 0.02                                                                                                                                  | -0.005, 0.04  | 0.1      | 0.002                                                                                                                                    | -0.02, 0.02   | 0.8      |
|                                   | Model 3 | 0.02                                                                                                                                  | -0.005, 0.04  | 0.1      | 0.001                                                                                                                                    | -0.02, 0.02   | 0.9      |
| Body fat, %                       | Model 1 | 1.79                                                                                                                                  | 0.06, 3.53    | 0.04     | 0.33                                                                                                                                     | -1.52, 2.18   | 0.7      |
|                                   | Model 2 | 1.85                                                                                                                                  | 0.11, 3.58    | 0.03     | 0.25                                                                                                                                     | -1.59, 2.09   | 0.7      |
|                                   | Model 3 | 1.84                                                                                                                                  | 0.13, 3.54    | 0.03     | 0.22                                                                                                                                     | -1.58, 2.03   | 0.8      |
| Triglycerides, mg/dL              | Model 1 | 14.32                                                                                                                                 | -23.25, 51.89 | 0.4      | 10.67                                                                                                                                    | -25.41, 46.73 | 0.5      |
|                                   | Model 2 | 16.64                                                                                                                                 | -20.61, 53.90 | 0.3      | 14.00                                                                                                                                    | -22.37, 50.38 | 0.4      |
|                                   | Model 3 | 16.28                                                                                                                                 | -20.77, 53.33 | 0.3      | 14.62                                                                                                                                    | -22.10, 51.35 | 0.4      |
|                                   | Model 4 | 9.73                                                                                                                                  | -26.10, 45.56 | 0.5      | 15.68                                                                                                                                    | -20.78, 52.14 | 0.3      |
| Total cholesterol, mg/dL          | Model 1 | 10.69                                                                                                                                 | -0.27, 21.65  | 0.05     | 3.38                                                                                                                                     | -7.52, 14.28  | 0.5      |
|                                   | Model 2 | 12.32                                                                                                                                 | 1.40, 23.24   | 0.02     | 4.47                                                                                                                                     | -6.40, 15.33  | 0.4      |
|                                   | Model 3 | 12.52                                                                                                                                 | 1.81, 22.24   | 0.02     | 4.21                                                                                                                                     | -6.44, 14.87  | 0.4      |
|                                   | Model 4 | 12.11                                                                                                                                 | 1.42, 22.80   | 0.02     | 4.26                                                                                                                                     | -6.43, 14.95  | 0.4      |
| HDL-c, mg/dL                      | Model 1 | -1.20                                                                                                                                 | -4.24, 1.84   | 0.4      | 0.14                                                                                                                                     | -3.28, 3.57   | 0.9      |
|                                   | Model 2 | -1.13                                                                                                                                 | -4.22, 1.96   | 0.4      | 0.13                                                                                                                                     | -3.30, 3.56   | 0.9      |
|                                   | Model 3 | -1.15                                                                                                                                 | -4.21, 1.91   | 0.4      | -0.02                                                                                                                                    | -3.42, 3.38   | 0.9      |
|                                   | Model 4 | -0.35                                                                                                                                 | -3.25, 2.55   | 0.8      | -0.07                                                                                                                                    | -3.38, 3.22   | 0.9      |
| Non-HDL-c <sup>2</sup> , mg/dL    | Model 1 | 11.89                                                                                                                                 | 1.24, 22.53   | 0.02     | 3.24                                                                                                                                     | -7.46, 13.93  | 0.5      |
|                                   | Model 2 | 13.45                                                                                                                                 | 2.86, 24.03   | 0.01     | 4.33                                                                                                                                     | -6.31, 14.98  | 0.4      |
|                                   | Model 3 | 13.67                                                                                                                                 | 3.28, 24.06   | 0.009    | 4.23                                                                                                                                     | -6.25, 14.72  | 0.4      |
|                                   | Model 4 | 12.45                                                                                                                                 | 2.18, 22.73   | 0.01     | 4.34                                                                                                                                     | -6.13, 14.81  | 0.4      |
| HbA1c, %                          | Model 1 | -0.18                                                                                                                                 | -0.60, 0.24   | 0.4      | -0.19                                                                                                                                    | -0.63, 0.24   | 0.3      |
|                                   | Model 2 | -0.18                                                                                                                                 | -0.60, 0.24   | 0.4      | -0.17                                                                                                                                    | -0.61, 0.27   | 0.4      |
|                                   | Model 3 | -0.18                                                                                                                                 | -0.60, 0.24   | 0.4      | -0.17                                                                                                                                    | -0.61, 0.27   | 0.4      |
|                                   | Model 4 | -0.21                                                                                                                                 | -0.63, 0.20   | 0.3      | -0.19                                                                                                                                    | -0.63, 0.25   | 0.3      |
| Fasting glucose, mg/dL            | Model 1 | -3.57                                                                                                                                 | -15.00, 7.87  | 0.5      | -3.06                                                                                                                                    | -15.20, 9.09  | 0.6      |
|                                   | Model 2 | -3.67                                                                                                                                 | -15.14, 7.80  | 0.5      | -2.31                                                                                                                                    | -14.49, 9.87  | 0.7      |
|                                   | Model 3 | -3.67                                                                                                                                 | -15.12, 7.78  | 0.5      | -2.39                                                                                                                                    | -14.57, 9.79  | 0.7      |
|                                   | Model 4 | -4.53                                                                                                                                 | -15.81, 6.75  | 0.4      | -3.00                                                                                                                                    | -15.08, 9.08  | 0.6      |
| 2-h post-challenge glucose, mg/dL | Model 1 | -5.74                                                                                                                                 | -13.58, 2.10  | 0.1      | -1.87                                                                                                                                    | -9.54, 5.80   | 0.6      |
|                                   | Model 2 | -4.85                                                                                                                                 | -12.74, 3.04  | 0.2      | -0.90                                                                                                                                    | -8.68, 6.89   | 0.8      |
|                                   | Model 3 | -5.09                                                                                                                                 | -12.94, 2.76  | 0.2      | -0.53                                                                                                                                    | -8.31, 7.24   | 0.8      |
|                                   | Model 4 | -6.27                                                                                                                                 | -13.97, 1.42  | 0.1      | -0.85                                                                                                                                    | -8.50, 6.79   | 0.8      |
| Systolic blood pressure, mmHg     |         |                                                                                                                                       |               |          |                                                                                                                                          |               |          |

|                                |         |      |             |      |       |             |     |
|--------------------------------|---------|------|-------------|------|-------|-------------|-----|
|                                | Model 1 | 2.43 | -2.07, 6.94 | 0.2  | -0.72 | -5.35, 3.92 | 0.7 |
|                                | Model 2 | 2.56 | -1.99, 7.12 | 0.2  | -0.51 | -5.20, 4.18 | 0.8 |
|                                | Model 3 | 2.56 | -1.97, 7.09 | 0.2  | -0.64 | -5.33, 4.04 | 0.7 |
|                                | Model 4 | 1.76 | -2.63, 6.51 | 0.4  | -0.41 | -4.98, 4.16 | 0.8 |
| Diastolic blood pressure, mmHg | Model 1 | 2.19 | -0.65, 5.02 | 0.1  | 0.73  | -2.11, 3.58 | 0.6 |
|                                | Model 2 | 2.45 | -0.39, 5.29 | 0.09 | 0.85  | -1.99, 3.70 | 0.5 |
|                                | Model 3 | 2.57 | -0.02, 5.35 | 0.06 | 0.67  | -2.12, 3.46 | 0.6 |
|                                | Model 4 | 1.95 | -0.71, 4.60 | 0.1  | 0.80  | -1.91, 3.51 | 0.5 |

1. Sample sizes were 1137 (BMI, waist circumference, waist-height ratio), 1097 (body fat percentage), 1105 (triglycerides, total cholesterol, HDL-c, non-HDL-c, fasting blood glucose), 1107 (HbA1c), 1023 (2-h post-challenge glucose), and 1138 (systolic and diastolic blood pressure). Estimates are the coefficients for the interaction specifying either exposure to *Atole* during the full period from conception to age 2 y or exposure to *Atole* during the partial period conception to age 2 y controlling for: fixed effects of birth village and treatment assignment (*Atole* vs. *Fresco*), age at intervention (exposed for full period vs no exposure during the period; exposed for partial period vs no exposure during the period), sex, and birth year (Model 1); maternal height, age at offspring's birth, and completed grades of schooling, and SES in 1967-75 (Model 2); SES in 2015-7, completed grades of schooling, and current residence (Guatemala City vs other) (Model 3); and current BMI and waist-height ratio (Model 4). Models for systolic blood pressure and diastolic blood pressure additionally controlled for current height and hypertension medication use. Models for HbA1c, fasting blood glucose, and post-challenge glucose additionally controlled for diabetes medication use. For missing covariates, we imputed sex-specific medians for continuous variables and sex-specific modes for discrete variables. We included dummy variables, coded as 1 if the data was missing or 0 otherwise, to account for the uncertainty in the imputed covariates. Confidence intervals account for clustering at the mother level. <sup>†</sup>  $P < 0.10$  for the interaction of sex and exposure to *Atole* for partial period from conception to age 2 y.
2. Non-HDL-c defined as LDL-c + IDL + VLDL.

Abbreviations: CI, confidence interval; HbA1c, glycated hemoglobin; IDL, intermediate density lipoprotein; INCAP, Institute of Nutrition for Central America and Panama; SES, socioeconomic status.

**Supplemental Table 9. Multivariate logistic difference-in-difference regression models to predict obesity, diabetes, hypertension, and metabolic syndrome in 2015-17 based on exposure to Atole (exposure during the full period from conception to age 2 y or exposure during the partial period from conception to age 2 y versus no exposure during the period from conception to age 2 y) in the INCAP Nutrition Supplementation Trial Longitudinal Cohort (n=684 women, n=455 men)<sup>1</sup>.**

| Cardio-metabolic risk factor    | Women                                                                                                                                 |      |                |                                                                                                                                          |      |                | Men                                                                                                                                   |      |                |                                                                                                                                          |      |                |
|---------------------------------|---------------------------------------------------------------------------------------------------------------------------------------|------|----------------|------------------------------------------------------------------------------------------------------------------------------------------|------|----------------|---------------------------------------------------------------------------------------------------------------------------------------|------|----------------|------------------------------------------------------------------------------------------------------------------------------------------|------|----------------|
|                                 | Difference-in-difference estimates for exposure to Atole for full period from conception to age 2 y vs. no exposure during the period |      |                | Difference-in-difference estimates for exposure to Atole for partial period from conception to age 2 y vs. no exposure during the period |      |                | Difference-in-difference estimates for exposure to Atole for full period from conception to age 2 y vs. no exposure during the period |      |                | Difference-in-difference estimates for exposure to Atole for partial period from conception to age 2 y vs. no exposure during the period |      |                |
|                                 | Odds Ratio (95% CI)                                                                                                                   | P    | C <sup>2</sup> | Odds Ratio (95% CI)                                                                                                                      | P    | C <sup>2</sup> | Odds Ratio (95% CI)                                                                                                                   | P    | C <sup>2</sup> | Odds Ratio (95% CI)                                                                                                                      | P    | C <sup>2</sup> |
| Obesity <sup>3</sup>            |                                                                                                                                       |      |                |                                                                                                                                          |      |                |                                                                                                                                       |      |                |                                                                                                                                          |      |                |
| Model 1                         | 1.91 (0.90, 4.07)                                                                                                                     | 0.09 | 0.56           | 1.31 (0.70, 2.47)                                                                                                                        | 0.3  | 0.56           | 1.12 (0.33, 3.74)                                                                                                                     | 0.8  | 0.64           | 1.18 (0.55, 2.55)                                                                                                                        | 0.6  | 0.64           |
| Model 2                         | 1.91 (0.89, 4.08)                                                                                                                     | 0.09 | 0.59           | 1.34 (0.70, 2.56)                                                                                                                        | 0.3  | 0.59           | 1.07 (0.31, 3.69)                                                                                                                     | 0.9  | 0.68           | 1.26 (0.57, 3.69)                                                                                                                        | 0.5  | 0.68           |
| Model 3                         | 1.95 (0.91, 4.20)                                                                                                                     | 0.08 | 0.61           | 1.39 (0.71, 2.70)                                                                                                                        | 0.3  | 0.61           | 1.20 (0.32, 4.48)                                                                                                                     | 0.7  | 0.73           | 1.78 (0.79, 4.01)                                                                                                                        | 0.1  | 0.73           |
| Diabetes <sup>4</sup>           |                                                                                                                                       |      |                |                                                                                                                                          |      |                |                                                                                                                                       |      |                |                                                                                                                                          |      |                |
| Model 1                         | 0.42 (0.15, 1.16)                                                                                                                     | 0.09 | 0.64           | 2.30 (0.95, 5.61)                                                                                                                        | 0.06 | 0.64           | 0.11 (0.02, 0.73)                                                                                                                     | 0.02 | 0.69           | 1.51 (0.48, 4.75)                                                                                                                        | 0.4  | 0.69           |
| Model 2                         | 0.41 (0.14, 1.18)                                                                                                                     | 0.09 | 0.66           | 2.28 (0.93, 5.61)                                                                                                                        | 0.07 | 0.66           | 0.12 (0.02, 0.78)                                                                                                                     | 0.02 | 0.75           | 1.04 (0.35, 3.10)                                                                                                                        | 0.9  | 0.75           |
| Model 3                         | - <sup>6</sup>                                                                                                                        | -    | -              | -                                                                                                                                        | -    | -              | 0.11 (0.01, 0.76)                                                                                                                     | 0.02 | 0.78           | 1.34 (0.41, 4.39)                                                                                                                        | 0.6  | 0.78           |
| Model 4                         | -                                                                                                                                     | -    | -              | -                                                                                                                                        | -    | -              | 0.12 (0.02, 0.85)                                                                                                                     | 0.03 | 0.80           | 1.43 (0.45, 4.58)                                                                                                                        | 0.5  | 0.80           |
| Hypertension <sup>5</sup>       |                                                                                                                                       |      |                |                                                                                                                                          |      |                |                                                                                                                                       |      |                |                                                                                                                                          |      |                |
| Model 1                         | 1.03 (0.40, 2.67)                                                                                                                     | 0.9  | 0.65           | 0.93 (0.42, 2.07)                                                                                                                        | 0.8  | 0.65           | 1.47 (0.26, 8.31)                                                                                                                     | 0.6  | 0.67           | 2.64 (0.76, 9.20)                                                                                                                        | 0.1  | 0.67           |
| Model 2                         | 1.09 (0.41, 2.89)                                                                                                                     | 0.8  | 0.66           | 0.84 (0.38, 1.87)                                                                                                                        | 0.6  | 0.66           | 1.88 (0.30, 11.87)                                                                                                                    | 0.5  | 0.73           | 2.78 (0.75, 10.30)                                                                                                                       | 0.1  | 0.73           |
| Model 3                         | 1.12 (0.41, 3.00)                                                                                                                     | 0.8  | 0.70           | 0.72 (0.32, 1.62)                                                                                                                        | 0.4  | 0.70           | 2.19 (0.30, 15.73)                                                                                                                    | 0.4  | 0.76           | 3.11 (0.77, 12.55)                                                                                                                       | 0.1  | 0.76           |
| Model 4                         | 1.08 (0.40, 2.91)                                                                                                                     | 0.8  | 0.73           | 0.69 (0.30, 1.58)                                                                                                                        | 0.3  | 0.73           | 1.95 (0.21, 18.18)                                                                                                                    | 0.5  | 0.69           | 3.74 (0.81, 17.28)                                                                                                                       | 0.09 | 0.69           |
| Metabolic syndrome <sup>6</sup> |                                                                                                                                       |      |                |                                                                                                                                          |      |                |                                                                                                                                       |      |                |                                                                                                                                          |      |                |
| Model 1                         | 1.26 (0.51, 3.13)                                                                                                                     | 0.6  | 0.59           | 1.29 (0.60, 2.77)                                                                                                                        | 0.5  | 0.59           | 0.60 (0.23, 1.55)                                                                                                                     | 0.2  | 0.60           | 1.91 (0.93, 3.92)                                                                                                                        | 0.07 | 0.60           |
| Model 2                         | 1.19 (0.47, 2.98)                                                                                                                     | 0.7  | 0.61           | 1.29 (0.59, 2.82)                                                                                                                        | 0.5  | 0.61           | 0.68 (0.26, 1.79)                                                                                                                     | 0.4  | 0.64           | 1.77 (0.86, 3.68)                                                                                                                        | 0.1  | 0.64           |
| Model 3                         | 1.25 (0.49, 3.19)                                                                                                                     | 0.4  | 0.65           | 1.28 (0.57, 2.88)                                                                                                                        | 0.6  | 0.65           | 0.71 (0.26, 1.92)                                                                                                                     | 0.5  | 0.68           | 2.39 (1.11, 5.14)                                                                                                                        | 0.02 | 0.68           |
| Model 4                         | 1.02 (0.40, 2.60)                                                                                                                     | 0.9  | 0.77           | 1.27 (0.55, 2.96)                                                                                                                        | 0.5  | 0.77           | 0.39 (0.11, 1.34)                                                                                                                     | 0.1  | 0.86           | 2.69 (1.12, 6.45)                                                                                                                        | 0.02 | 0.86           |

- Sample sizes were 670 and 435 (diabetes) 683 and 455 (hypertension), and 669 and 435 (metabolic syndrome) for women and men, respectively. Estimates are odds ratios and 95% confidence intervals for the interaction term specifying either exposure to *Atole* during the full period from conception to age 2 y or exposure to *Atole* during the partial period from conception to age 2 y controlling for: fixed effects of birth village and treatment assignment (*Atole* vs. *Fresco*), age at intervention (exposed for full period vs no exposure during the period; exposed for partial period vs no exposure during the period), and birth year (Model 1); maternal height, age at offspring's birth, and completed grades of schooling, and SES in 1967-75 (Model 2); SES in 2015-7, completed grades of schooling, and current residence (Guatemala City vs other) (Model 3); and current BMI and waist-height ratio (Model 4). Models for hypertension and metabolic syndrome additionally controlled for current height. For missing covariates, we imputed sex-specific medians for continuous variables and sex-specific modes for discrete variables. We included dummy variables, coded as 1 if the data was missing or 0 otherwise, to account for the uncertainty in the imputed covariates. Because results from Models 1, 2 and 3 were statistically indistinguishable, we present the findings from Models 3 and 4. Confidence intervals account for clustering at the mother level.
- C statistic values >0.70 indicate good model fit.

3. Obesity defined as  $BMI \geq 30 \text{ kg/m}^2$ .
4. Diabetes defined according to the American Diabetes Association diagnostic criteria: fasting plasma glucose  $\geq 126 \text{ mg/dL}$ , and/or post-challenge glucose  $\geq 200 \text{ mg/dL}$ , and/or diabetes medication use.
5. Hypertension defined according to the Seventh report of the Joint National Committee on Prevention, Detection, Evaluation, and Treatment of High Blood Pressure: systolic blood pressure  $\geq 140 \text{ mmHg}$  and/or diastolic blood pressure  $\geq 90 \text{ mmHg}$  and/or hypertension medication use.
6. Metabolic syndrome defined according to 2005 NCEP ATP III diagnostic criteria as presence of  $\geq 3$  of: central obesity (waist circumference  $>99 \text{ cm}$  for women and  $>102 \text{ cm}$  for men); fasting plasma glucose  $\geq 100 \text{ mg/dL}$  or diabetes medication use; triglycerides  $\geq 150 \text{ mg/dL}$  or lipid medication use; HDL-c  $<50 \text{ mg/dL}$  (women) and  $<40 \text{ mg/dL}$  (men); and blood pressure  $\geq 130 \text{ mmHg}$  systolic,  $\geq 85 \text{ mmHg}$  diastolic and/or hypertension medication use.
7. Maximum likelihood estimation resulted in a non-positive definite solution.

Abbreviations: ADA, American Diabetes Association; CI, confidence interval; INCAP, Institute of Nutrition for Central America and Panama; NCEP ATP III, National Cholesterol Education Program Adult Treatment Panel III; SES, socioeconomic status.

**Supplemental Table 10. Multivariate logistic difference-in-difference regression models to predict obesity, diabetes, hypertension, and metabolic syndrome in 2015-17 based on exposure to Atole (exposure during the full period from conception to age 2 y or exposure during the partial period from conception to age 2 y versus no exposure during the period from conception to age 2 y) in the INCAP Nutrition Supplementation Trial Longitudinal Cohort (n=1139) <sup>1</sup>.**

| Cardio-metabolic risk factor    |         | Pooled                                                                                                                                |      |                |                                                                                                                                          |      |                |
|---------------------------------|---------|---------------------------------------------------------------------------------------------------------------------------------------|------|----------------|------------------------------------------------------------------------------------------------------------------------------------------|------|----------------|
|                                 |         | Difference-in-difference estimates for exposure to Atole for full period from conception to age 2 y vs. no exposure during the period |      |                | Difference-in-difference estimates for exposure to Atole for partial period from conception to age 2 y vs. no exposure during the period |      |                |
|                                 |         | Odds Ratio (95% CI)                                                                                                                   | P    | C <sup>2</sup> | Odds Ratio (95% CI)                                                                                                                      | P    | C <sup>2</sup> |
| Obesity <sup>3</sup>            | Model 1 | 1.80 (0.96, 3.38)                                                                                                                     | 0.06 | 0.65           | 1.22 (0.73, 2.02)                                                                                                                        | 0.4  | 0.65           |
|                                 | Model 2 | 1.85 (0.98, 3.48)                                                                                                                     | 0.05 | 0.66           | 1.27 (0.76, 2.13)                                                                                                                        | 0.3  | 0.66           |
|                                 | Model 3 | 1.87 (0.99, 3.55)                                                                                                                     | 0.05 | 0.68           | 1.37 (0.81, 2.32)                                                                                                                        | 0.2  | 0.68           |
| Diabetes <sup>4</sup>           | Model 1 | 0.34 (0.15, 0.80)                                                                                                                     | 0.01 | 0.66           | 1.87 (0.90, 3.90)                                                                                                                        | 0.09 | 0.66           |
|                                 | Model 2 | 0.35 (0.15, 0.84)                                                                                                                     | 0.01 | 0.67           | 1.80 (0.86, 3.81)                                                                                                                        | 0.1  | 0.67           |
|                                 | Model 3 | 0.36 (0.15, 0.86)                                                                                                                     | 0.02 | 0.68           | 1.75 (0.83, 3.71)                                                                                                                        | 0.1  | 0.68           |
|                                 | Model 4 | 0.36 (0.15, 0.86)                                                                                                                     | 0.02 | 0.70           | 1.79 (0.84, 3.82)                                                                                                                        | 0.1  | 0.70           |
| Hypertension <sup>5</sup>       | Model 1 | 1.05 (0.46, 2.43)                                                                                                                     | 0.8  | 0.69           | 1.24 (0.64, 2.40)                                                                                                                        | 0.5  | 0.69           |
|                                 | Model 2 | 1.12 (0.47, 2.63)                                                                                                                     | 0.8  | 0.70           | 1.15 (0.59, 2.24)                                                                                                                        | 0.6  | 0.70           |
|                                 | Model 3 | 1.17 (0.49, 2.77)                                                                                                                     | 0.7  | 0.71           | 1.15 (0.59, 2.24)                                                                                                                        | 0.6  | 0.71           |
|                                 | Model 4 | 1.10 (0.46, 2.65)                                                                                                                     | 0.8  | 0.76           | 1.15 (0.58, 2.30)                                                                                                                        | 0.6  | 0.76           |
| Metabolic syndrome <sup>6</sup> | Model 1 | 0.93 (0.49, 1.78)                                                                                                                     | 0.8  | 0.74           | 1.54 (0.89, 2.66)                                                                                                                        | 0.1  | 0.74           |
|                                 | Model 2 | 0.94 (0.49, 1.82)                                                                                                                     | 0.8  | 0.74           | 1.55 (0.89, 2.69)                                                                                                                        | 0.1  | 0.74           |
|                                 | Model 3 | 0.94 (0.48, 1.81)                                                                                                                     | 0.8  | 0.75           | 1.68 (0.95, 2.99)                                                                                                                        | 0.07 | 0.75           |
|                                 | Model 4 | 0.64 (0.32, 1.29)                                                                                                                     | 0.2  | 0.86           | 1.83* (1.04, 3.22)                                                                                                                       | 0.03 | 0.86           |

1. Sample sizes were 1105 (diabetes) 1138 (hypertension), and 1104 (metabolic syndrome). Estimates are odds ratios and 95% confidence intervals for the interaction term specifying either exposure to *Atole* during the full period from conception to age 2 y or exposure to *Atole* during the partial period conception to age 2 y controlling for: fixed effects of birth village and treatment assignment (*Atole* vs. *Fresco*), age at intervention (exposed for full period vs no exposure during the period; exposed for partial period vs no exposure during the period), sex, and birth year (Model 1); maternal height, age at offspring's birth, and completed grades of schooling, and SES in 1967-75 (Model 2); SES in 2015-7, completed grades of schooling, and current residence (Guatemala City vs other) (Model 3); and current BMI and waist-height ratio (Model 4). Models for hypertension and metabolic syndrome additionally controlled for current height. For missing covariates, we imputed sex-specific medians for continuous variables and sex-specific modes for discrete variables. We included dummy variables, coded as 1 if the data was missing or 0 otherwise, to account for the uncertainty in the imputed covariates. Confidence intervals account for clustering at the mother level.
2. C statistic values >0.70 indicate good model fit.
3. Obesity defined as BMI  $\geq 30$  kg/m<sup>2</sup>.
4. Diabetes defined according to the American Diabetes Association diagnostic criteria: fasting plasma glucose  $\geq 126$  mg/dL, and/or post-challenge glucose  $\geq 200$  mg/dL, and/or diabetes medication use.
5. Hypertension defined according to the Seventh report of the Joint National Committee on Prevention, Detection, Evaluation, and Treatment of High Blood Pressure: systolic blood pressure  $\geq 140$  mmHg and/or diastolic blood pressure  $\geq 90$  mmHg and/or hypertension medication use.
6. Metabolic syndrome defined according to 2005 NCEP ATP III diagnostic criteria as presence of  $\geq 3$  of: central obesity (waist circumference >88 cm for women and >102 cm for men); fasting plasma glucose  $\geq 110$  mg/dL or diabetes medication use; triglycerides  $\geq 150$  mg/dL or lipid medication use; HDL-c <50

mg/dL (women) and <40 mg/dL (men); and blood pressure  $\geq 130$  mmHg systolic,  $\geq 85$  mmHg diastolic and/or hypertension medication use.

Abbreviations: ADA, American Diabetes Association; CI, confidence interval; INCAP, Institute of Nutrition for Central America and Panama; NCEP ATP III, National Cholesterol Education Program Adult Treatment Panel III; SES, socioeconomic status.

**Supplemental Table 11. Multivariate logistic difference-in-difference regression models to predict components of metabolic syndrome in 2015-17 based on exposure to Atole (exposure during the full period from conception to age 2 y, exposure during the partial period from conception to age 2 y versus no exposure during the period from conception to age 2 y) in the INCAP Nutrition Supplementation Trial Longitudinal Cohort (n=684 women, n=455 men)<sup>1</sup>.**

| Cardio-metabolic risk factor                                   | Women                                                                                                                                 |     |                |                                                                                                                                          |      |                | Men                                                                                                                                   |     |                |                                                                                                                                          |      |                |
|----------------------------------------------------------------|---------------------------------------------------------------------------------------------------------------------------------------|-----|----------------|------------------------------------------------------------------------------------------------------------------------------------------|------|----------------|---------------------------------------------------------------------------------------------------------------------------------------|-----|----------------|------------------------------------------------------------------------------------------------------------------------------------------|------|----------------|
|                                                                | Difference-in-difference estimates for exposure to Atole for full period from conception to age 2 y vs. no exposure during the period |     |                | Difference-in-difference estimates for exposure to Atole for partial period from conception to age 2 y vs. no exposure during the period |      |                | Difference-in-difference estimates for exposure to Atole for full period from conception to age 2 y vs. no exposure during the period |     |                | Difference-in-difference estimates for exposure to Atole for partial period from conception to age 2 y vs. no exposure during the period |      |                |
|                                                                | Odds Ratio (95% CI)                                                                                                                   | P   | C <sup>2</sup> | Odds Ratio (95% CI)                                                                                                                      | P    | C <sup>2</sup> | Odds Ratio (95% CI)                                                                                                                   | P   | C <sup>2</sup> | Odds Ratio (95% CI)                                                                                                                      | P    | C <sup>2</sup> |
| Central obesity <sup>3</sup>                                   |                                                                                                                                       |     |                |                                                                                                                                          |      |                |                                                                                                                                       |     |                |                                                                                                                                          |      |                |
| Model 1                                                        | 2.46 (0.70, 8.62)                                                                                                                     | 0.1 | 0.61           | 0.91 (0.35, 2.34)                                                                                                                        | 0.8  | 0.61           | 1.42 (0.45, 4.47)                                                                                                                     | 0.5 | 0.67           | 1.68 (0.79, 3.56)                                                                                                                        | 0.1  | 0.67           |
| Model 2                                                        | 2.33 (0.65, 8.34)                                                                                                                     | 0.1 | 0.64           | 0.81 (0.30, 2.21)                                                                                                                        | 0.6  | 0.64           | 1.46 (0.44, 4.82)                                                                                                                     | 0.5 | 0.71           | 1.56 (0.73, 3.32)                                                                                                                        | 0.2  | 0.71           |
| Model 3                                                        | 2.33 (0.64, 8.45)                                                                                                                     | 0.1 | 0.69           | 0.83 (0.30, 2.28)                                                                                                                        | 0.7  | 0.69           | 1.51 (0.44, 5.17)                                                                                                                     | 0.5 | 0.74           | 2.14 (0.98, 4.66)                                                                                                                        | 0.05 | 0.74           |
| Elevated fasting plasma glucose or medication use <sup>4</sup> |                                                                                                                                       |     |                |                                                                                                                                          |      |                |                                                                                                                                       |     |                |                                                                                                                                          |      |                |
| Model 1                                                        | 1.06 (0.50, 2.24)                                                                                                                     | 0.8 | 0.64           | 2.04 (1.04, 4.02)                                                                                                                        | 0.03 | 0.64           | 1.00 (0.40, 2.53)                                                                                                                     | 0.9 | 0.59           | 1.12 (0.53, 2.34)                                                                                                                        | 0.7  | 0.59           |
| Model 2                                                        | 1.03 (0.48, 2.21)                                                                                                                     | 0.9 | 0.67           | 1.93 (0.97, 3.82)                                                                                                                        | 0.06 | 0.67           | 0.97 (0.38, 2.51)                                                                                                                     | 0.9 | 0.61           | 1.09 (0.52, 2.30)                                                                                                                        | 0.8  | 0.61           |
| Model 3                                                        | 1.03 (0.48, 2.22)                                                                                                                     | 0.9 | 0.68           | 2.04 (1.02, 4.10)                                                                                                                        | 0.04 | 0.68           | 0.97 (0.37, 2.58)                                                                                                                     | 0.9 | 0.64           | 1.33 (0.62, 2.87)                                                                                                                        | 0.4  | 0.64           |
| Model 4                                                        | 0.95 (0.44, 2.06)                                                                                                                     | 0.9 | 0.70           | 2.08 (1.02, 4.25)                                                                                                                        | 0.04 | 0.70           | 0.90 (0.33, 2.42)                                                                                                                     | 0.8 | 0.69           | 1.36 (0.63, 2.94)                                                                                                                        | 0.4  | 0.69           |
| Elevated triglycerides or medication use <sup>5</sup>          |                                                                                                                                       |     |                |                                                                                                                                          |      |                |                                                                                                                                       |     |                |                                                                                                                                          |      |                |
| Model 1                                                        | 1.22 (0.50, 2.97)                                                                                                                     | 0.6 | 0.54           | 0.90 (0.43, 1.87)                                                                                                                        | 0.7  | 0.54           | 2.24 (0.79, 6.37)                                                                                                                     | 0.1 | 0.58           | 0.56 (0.23, 1.35)                                                                                                                        | 0.1  | 0.58           |
| Model 2                                                        | 1.22 (0.49, 3.01)                                                                                                                     | 0.6 | 0.57           | 0.88 (0.42, 1.84)                                                                                                                        | 0.7  | 0.57           | - <sup>7</sup>                                                                                                                        | -   | -              | -                                                                                                                                        | -    | -              |
| Model 3                                                        | 1.22 (0.49, 3.03)                                                                                                                     | 0.6 | 0.60           | 0.90 (0.42, 1.92)                                                                                                                        | 0.7  | 0.60           | -                                                                                                                                     | -   | -              | -                                                                                                                                        | -    | -              |
| Model 4                                                        | 1.10 (0.44, 2.74)                                                                                                                     | 0.8 | 0.65           | 0.91 (0.42, 1.98)                                                                                                                        | 0.8  | 0.65           | -                                                                                                                                     | -   | -              | -                                                                                                                                        | -    | -              |
| Low HDL-c <sup>6</sup>                                         |                                                                                                                                       |     |                |                                                                                                                                          |      |                |                                                                                                                                       |     |                |                                                                                                                                          |      |                |
| Model 1                                                        | 1.17 (0.38, 3.57)                                                                                                                     | 0.7 | 0.58           | 1.45 (0.56, 3.77)                                                                                                                        | 0.4  | 0.58           | 1.33 (0.46, 3.82)                                                                                                                     | 0.6 | 0.63           | 0.90 (0.35, 2.33)                                                                                                                        | 0.8  | 0.63           |
| Model 2                                                        | - <sup>7</sup>                                                                                                                        | -   | -              | -                                                                                                                                        | -    | -              | 1.64 (0.55, 4.93)                                                                                                                     | 0.3 | 0.67           | 0.67 (0.24, 1.86)                                                                                                                        | 0.4  | 0.67           |
| Model 3                                                        | -                                                                                                                                     | -   | -              | -                                                                                                                                        | -    | -              | 1.66 (0.55, 4.95)                                                                                                                     | 0.3 | 0.68           | 0.66 (0.23, 1.87)                                                                                                                        | 0.4  | 0.68           |
| Model 4                                                        | -                                                                                                                                     | -   | -              | -                                                                                                                                        | -    | -              | 1.44 (0.46, 4.49)                                                                                                                     | 0.5 | 0.77           | 0.59 (0.21, 1.71)                                                                                                                        | 0.3  | 0.77           |
| Elevated blood pressure or medication use <sup>7</sup>         |                                                                                                                                       |     |                |                                                                                                                                          |      |                |                                                                                                                                       |     |                |                                                                                                                                          |      |                |
| Model 1                                                        | 1.82 (0.83, 3.97)                                                                                                                     | 0.1 | 0.61           | 0.71 (0.37, 1.35)                                                                                                                        | 0.2  | 0.61           | 0.51 (0.19, 1.35)                                                                                                                     | 0.1 | 0.61           | 1.96 (0.89, 4.29)                                                                                                                        | 0.09 | 0.61           |
| Model 2                                                        | 1.80 (0.82, 3.96)                                                                                                                     | 0.1 | 0.63           | 0.67 (0.35, 1.30)                                                                                                                        | 0.2  | 0.63           | 0.52 (0.19, 1.43)                                                                                                                     | 0.2 | 0.63           | 1.97 (0.89, 4.40)                                                                                                                        | 0.09 | 0.63           |
| Model 3                                                        | 1.90 (0.85, 4.24)                                                                                                                     | 0.1 | 0.66           | 0.69 (0.35, 1.35)                                                                                                                        | 0.2  | 0.66           | 0.54 (0.20, 1.49)                                                                                                                     | 0.2 | 0.65           | 2.28 (1.00, 5.16)                                                                                                                        | 0.04 | 0.65           |
| Model 4                                                        | 1.77 (0.73, 3.94)                                                                                                                     | 0.1 | 0.69           | 0.67 (0.33, 1.33)                                                                                                                        | 0.2  | 0.69           | - <sup>7</sup>                                                                                                                        | -   | -              | -                                                                                                                                        | -    | -              |

1. Sample sizes were 670 and 435 (diabetes) 683 and 455 (hypertension), and 669 and 435 (metabolic syndrome) for women and men, respectively.

Estimates are odds ratios and 95% confidence intervals for the interaction terms either specifying exposure to *Atole* during the full period from conception to age 2 y or exposure to *Atole* during the partial period conception to age 2 y controlling for: fixed effects of birth village and treatment

assignment (*Atole* vs. *Fresco*), age at intervention (exposed for full period vs no exposure during the period; exposed for partial period vs no exposure during the period), birth year (Model 1); maternal height, age at offspring's birth, and completed grades of schooling, and SES in 1967-75 (Model 2); SES in 2015-7, completed grades of schooling, and current residence (Guatemala City vs other) (Model 3); and current BMI and waist-height ratio (Model 4). Models for elevated blood pressure additionally controlled for current height. For missing covariates, we imputed sex-specific medians for continuous variables and sex-specific modes for discrete variables. We included dummy variables, coded as 1 if the data was missing or 0 otherwise, to account for the uncertainty in the imputed covariates. Confidence intervals account for clustering at the mother level.

2. C statistic values  $>0.70$  indicate good model fit.
3. Central obesity defined as waist circumference  $>88$  cm for women and  $>102$  cm for men.
4. Elevated fasting plasma glucose ( $\geq 100$  mg/dL) or diabetes medication use.
5. Elevated triglycerides defined as  $\geq 150$  mg/dL or lipid medication use.
6. Low HDL-c defined as HDL-c  $<50$  mg/dL for women and  $<40$  mg/dL for men.
7. Elevated blood pressure defined as systolic blood pressure  $\geq 130$  mmHg and/or diastolic blood pressure  $\geq 85$  mmHg and/or hypertension medication use.
8. Maximum likelihood estimation resulted in a non-positive definite solution..

Abbreviations: CI, confidence interval; HDL-c, high density lipoprotein cholesterol; INCAP, Institute of Nutrition for Central America and Panama; NCEP ATP III, National Cholesterol Education Program Adult Treatment Panel III; SES, socioeconomic status.



**Supplemental Table 12. Multivariate logistic difference-in-difference regression models to predict components of metabolic syndrome in 2015-17 based on exposure to Atole (exposure during the full period from conception to age 2 y, exposure during the partial period from conception to age 2 y versus no exposure during the period from conception to age 2 y) in the INCAP Nutrition Supplementation Trial Longitudinal Cohort (n=1139)<sup>1</sup>.**

|                                              |         | Pooled                                                                                                                                |     |                |                                                                                                                                          |      |                |
|----------------------------------------------|---------|---------------------------------------------------------------------------------------------------------------------------------------|-----|----------------|------------------------------------------------------------------------------------------------------------------------------------------|------|----------------|
|                                              |         | Difference-in-difference estimates for exposure to Atole for full period from conception to age 2 y vs. no exposure during the period |     |                | Difference-in-difference estimates for exposure to Atole for partial period from conception to age 2 y vs. no exposure during the period |      |                |
| Cardio-metabolic risk factor                 |         | Odds Ratio (95% CI)                                                                                                                   | P   | C <sup>2</sup> | Odds Ratio (95% CI)                                                                                                                      | P    | C <sup>2</sup> |
| Central obesity <sup>3</sup>                 | Model 1 | 1.86 (0.81, 4.26)                                                                                                                     | 0.1 | 0.87           | 1.40 (0.68, 2.89)                                                                                                                        | 0.3  | 0.87           |
|                                              | Model 2 | 1.89 (0.81, 4.39)                                                                                                                     | 0.1 | 0.88           | 1.42 (0.68, 2.95)                                                                                                                        | 0.3  | 0.88           |
|                                              | Model 3 | 1.84 (0.79, 4.25)                                                                                                                     | 0.1 | 0.89           | 1.70 (0.81, 3.58)                                                                                                                        | 0.1  | 0.89           |
| Elevated fasting plasma glucose <sup>4</sup> | Model 1 | 1.04 (0.58, 1.85)                                                                                                                     | 0.9 | 0.62           | 1.59 (0.99, 2.58)                                                                                                                        | 0.05 | 0.62           |
|                                              | Model 2 | 1.00 (0.56, 1.81)                                                                                                                     | 0.9 | 0.64           | 1.55 (0.95, 2.53)                                                                                                                        | 0.07 | 0.64           |
|                                              | Model 3 | 1.00 (0.55, 1.81)                                                                                                                     | 0.9 | 0.65           | 1.70 (1.03, 2.79)                                                                                                                        | 0.03 | 0.65           |
|                                              | Model 4 | 0.91 (0.50, 1.66)                                                                                                                     | 0.7 | 0.68           | 1.74 (1.05, 2.87)                                                                                                                        | 0.03 | 0.68           |
| Elevated triglycerides <sup>5</sup>          | Model 1 | 1.64 (0.83, 3.24)                                                                                                                     | 0.1 | 0.55           | 0.69 (0.40, 1.22)                                                                                                                        | 0.2  | 0.55           |
|                                              | Model 2 | 1.74 (0.87, 3.48)                                                                                                                     | 0.1 | 0.58           | 0.68 (0.39, 1.19)                                                                                                                        | 0.1  | 0.58           |
|                                              | Model 3 | 1.73 (0.86, 3.46)                                                                                                                     | 0.1 | 0.60           | 0.70 (0.39, 1.24)                                                                                                                        | 0.2  | 0.60           |
|                                              | Model 4 | 1.54 (0.77, 3.10)                                                                                                                     | 0.2 | 0.67           | 0.69 (0.38, 1.23)                                                                                                                        | 0.2  | 0.67           |
| Low HDL-c <sup>6</sup>                       | Model 1 | 1.30 (0.60, 2.81)                                                                                                                     | 0.5 | 0.65           | 1.05 (0.53, 2.07)                                                                                                                        | 0.8  | 0.65           |
|                                              | Model 2 | 1.32 (0.60, 2.88)                                                                                                                     | 0.4 | 0.66           | 1.02 (0.51, 2.06)                                                                                                                        | 0.9  | 0.66           |
|                                              | Model 3 | 1.30 (0.59, 2.87)                                                                                                                     | 0.5 | 0.68           | 0.94 (0.46, 1.92)                                                                                                                        | 0.8  | 0.68           |
|                                              | Model 4 | 1.08 (0.48, 2.39)                                                                                                                     | 0.8 | 0.75           | 0.93 (0.45, 1.89)                                                                                                                        | 0.8  | 0.75           |
| Elevated blood pressure <sup>7</sup>         | Model 1 | 1.08 <sup>†</sup> (0.59, 1.98)                                                                                                        | 0.7 | 0.59           | 1.08 <sup>†</sup> (0.66, 1.77)                                                                                                           | 0.7  | 0.59           |
|                                              | Model 2 | 1.09 <sup>†</sup> (0.59, 2.01)                                                                                                        | 0.7 | 0.61           | 1.05 <sup>†</sup> (0.63, 1.72)                                                                                                           | 0.8  | 0.61           |
|                                              | Model 3 | 1.12 <sup>†</sup> (0.61, 2.07)                                                                                                        | 0.7 | 0.63           | 1.14 <sup>†</sup> (0.69, 1.89)                                                                                                           | 0.6  | 0.63           |
|                                              | Model 4 | 1.03 <sup>†</sup> (0.54, 1.94)                                                                                                        | 0.9 | 0.69           | 1.14 <sup>†</sup> (0.67, 1.91)                                                                                                           | 0.6  | 0.69           |

- Sample sizes were 1105 (diabetes) 1138 (hypertension), and 1104 (metabolic syndrome). Estimates are odds ratios and 95% confidence intervals for the interaction terms either specifying exposure to *Atole* during the full period from conception to age 2 y or exposure to *Atole* during the partial period from conception to age 2 y controlling for: fixed effects of birth village and treatment assignment (*Atole* vs. *Fresco*), age at intervention (exposed for full period vs no exposure during the period; exposed for partial period vs no exposure during the period), sex, and birth year (Model 1); maternal height, age at offspring's birth, and completed grades of schooling, and SES in 1967-75 (Model 2); SES in 2015-7, completed grades of schooling, and current residence (Guatemala City vs other) (Model 3); and current BMI and waist-height ratio (Model 4). Models for elevated blood pressure additionally controlled for current height. For missing covariates, we imputed sex-specific medians for continuous variables and sex-specific modes for discrete variables. We included dummy variables, coded as 1 if the data was missing or 0 otherwise, to account for the uncertainty in the imputed covariates. Confidence intervals account for clustering at the mother level. <sup>†</sup> $P < 0.10$  for the interaction of sex and exposure to *Atole* for partial period from conception to age 2 y.
- C statistic values  $>0.70$  indicate good model fit.
- Central obesity defined as waist circumference  $>88$  for women and  $>102$  cm for men.
- Elevated fasting plasma glucose ( $\geq 100$  mg/dL) or diabetes medication use.
- Elevated triglycerides defined as  $\geq 150$  mg/dL or lipid medication use.
- Low HDL-c defined as HDL-c  $<50$  mg/dL for women and  $<40$  mg/dL for men.
- Elevated blood pressure defined as systolic blood pressure  $\geq 130$  mmHg and/or diastolic blood pressure  $\geq 85$  mmHg and/or hypertension medication use.

Abbreviations: CI, confidence interval; HDL-c, high density lipoprotein cholesterol; INCAP, Institute of Nutrition for Central America and Panama; NCEP ATP III, National Cholesterol Education Program Adult Treatment Panel III; SES, socioeconomic status.

**Supplemental Table 13. Multivariate generalized linear difference-in-difference regression models to predict cardio-metabolic risk factors in 2015-17 based on exposure to Atole from 36 to 72 months in the INCAP Nutrition Supplementation Trial Longitudinal Cohort (n=684 women, n=455 men)<sup>1</sup>.**

| Cardio-metabolic risk factor   |         | Women                                                                                  |               |     | Men                                                                                    |               |      | Pooled                                                                                 |               |     |
|--------------------------------|---------|----------------------------------------------------------------------------------------|---------------|-----|----------------------------------------------------------------------------------------|---------------|------|----------------------------------------------------------------------------------------|---------------|-----|
|                                |         | Difference-in-difference estimates for exposure to Atole from 36 - 72 months vs. other |               |     | Difference-in-difference estimates for exposure to Atole from 36 - 72 months vs. other |               |      | Difference-in-difference estimates for exposure to Atole from 36 - 72 months vs. other |               |     |
|                                |         | $\beta$                                                                                | 95% CI        | P   | $\beta$                                                                                | 95% CI        | P    | $\beta$                                                                                | 95% CI        | P   |
| BMI, kg/m <sup>2</sup>         | Model 1 | 0.73                                                                                   | -0.99, 2.44   | 0.4 | -0.66                                                                                  | -2.27, 0.94   | 0.4  | 0.23                                                                                   | -0.98, 1.45   | 0.7 |
|                                | Model 2 | 0.73                                                                                   | -0.98, 2.44   | 0.4 | -0.55                                                                                  | -2.15, 1.05   | 0.5  | 0.28                                                                                   | -0.94, 1.50   | 0.6 |
|                                | Model 3 | 0.86                                                                                   | -0.83, 2.56   | 0.3 | -0.66                                                                                  | -2.19, 0.85   | 0.3  | 0.34                                                                                   | -0.85, 1.54   | 0.5 |
| Waist circumference, cm        | Model 1 | 2.30                                                                                   | -1.73, 6.33   | 0.2 | -2.70                                                                                  | -6.73, 1.31   | 0.1  | 0.44 <sup>†</sup>                                                                      | -2.50, 3.38   | 0.7 |
|                                | Model 2 | 2.59                                                                                   | -1.39, 6.58   | 0.2 | -2.31                                                                                  | -6.37, 1.75   | 0.2  | 0.79 <sup>†</sup>                                                                      | -2.14, 3.73   | 0.5 |
|                                | Model 3 | 2.71                                                                                   | -1.23, 6.65   | 0.1 | -2.54                                                                                  | -6.44, 1.35   | 0.2  | 0.90 <sup>†</sup>                                                                      | -2.00, 3.81   | 0.5 |
| Waist-height ratio             | Model 1 | 0.02                                                                                   | -0.01, 0.04   | 0.2 | -0.008                                                                                 | -0.03, 0.01   | 0.4  | 0.007                                                                                  | -0.01, 0.02   | 0.4 |
|                                | Model 2 | 0.01                                                                                   | -0.01, 0.04   | 0.2 | -0.009                                                                                 | -0.03, 0.01   | 0.4  | 0.007                                                                                  | -0.01, 0.02   | 0.4 |
|                                | Model 3 | 0.01                                                                                   | -0.01, 0.04   | 0.2 | -0.01                                                                                  | -0.03, 0.01   | 0.4  | 0.007                                                                                  | -0.01, 0.02   | 0.4 |
| Body fat, %                    | Model 1 | 0.49                                                                                   | -1.42, 2.40   | 0.6 | -0.84                                                                                  | -3.58, 1.90   | 0.5  | 0.04                                                                                   | -1.56, 1.64   | 0.9 |
|                                | Model 2 | 0.50                                                                                   | -1.43, 2.43   | 0.6 | -0.76                                                                                  | -3.47, 1.95   | 0.5  | 0.08                                                                                   | -1.52, 1.68   | 0.9 |
|                                | Model 3 | 0.73                                                                                   | -1.15, 2.62   | 0.4 | -0.83                                                                                  | -3.42, 1.77   | 0.5  | 0.22                                                                                   | -1.34, 1.78   | 0.7 |
| Triglycerides, mg/dL           | Model 1 | 4.50                                                                                   | -34.34, 43.34 | 0.8 | 8.53                                                                                   | -49.38, 66.44 | 0.7  | 7.51                                                                                   | -25.02, 40.04 | 0.6 |
|                                | Model 2 | 5.55                                                                                   | -33.18, 44.28 | 0.7 | 11.12                                                                                  | -47.05, 69.29 | 0.7  | 7.73                                                                                   | -24.83, 40.29 | 0.6 |
|                                | Model 3 | 3.83                                                                                   | -35.08, 42.74 | 0.8 | 12.31                                                                                  | -45.62, 70.25 | 0.6  | 8.45                                                                                   | -24.34, 41.24 | 0.6 |
|                                | Model 4 | 3.28                                                                                   | -35.39, 41.96 | 0.8 | 13.31                                                                                  | -40.64, 67.25 | 0.6  | 6.37                                                                                   | -25.59, 38.34 | 0.6 |
| Total cholesterol, mg/dL       | Model 1 | -1.27                                                                                  | -14.54, 11.99 | 0.8 | 14.37                                                                                  | -1.07, 29.81  | 0.06 | 4.40                                                                                   | -5.65, 14.46  | 0.3 |
|                                | Model 2 | -0.02                                                                                  | -12.97, 12.92 | 0.9 | 13.94                                                                                  | -1.57, 29.45  | 0.07 | 5.07                                                                                   | -4.88, 15.02  | 0.3 |
|                                | Model 3 | 1.90                                                                                   | -10.81, 14.61 | 0.7 | 13.02                                                                                  | -2.14, 28.19  | 0.09 | 5.88                                                                                   | -3.85, 15.61  | 0.2 |
|                                | Model 4 | 1.86                                                                                   | -10.85, 14.57 | 0.7 | 13.26                                                                                  | -1.89, 28.41  | 0.08 | 5.72                                                                                   | -4.01, 15.46  | 0.2 |
| HDL-c, mg/dL                   | Model 1 | -0.71                                                                                  | -4.85, 3.42   | 0.7 | 4.95                                                                                   | 0.71, 9.19    | 0.02 | 1.40 <sup>†</sup>                                                                      | -1.61, 4.41   | 0.3 |
|                                | Model 2 | -0.41                                                                                  | -4.53, 3.70   | 0.8 | 4.10                                                                                   | -0.09, 8.29   | 0.05 | 1.47 <sup>†</sup>                                                                      | -1.55, 4.49   | 0.3 |
|                                | Model 3 | 0.02                                                                                   | -3.94, 3.99   | 0.9 | 3.82                                                                                   | -0.31, 7.96   | 0.07 | 1.41 <sup>†</sup>                                                                      | -1.57, 4.39   | 0.3 |
|                                | Model 4 | 0.30                                                                                   | -3.58, 4.17   | 0.8 | 3.86                                                                                   | -0.05, 7.78   | 0.05 | 1.74                                                                                   | -1.14, 4.62   | 0.2 |
| Non-HDL-c <sup>2</sup> , mg/dL | Model 1 | -0.56                                                                                  | -13.07, 11.95 | 0.9 | 9.42                                                                                   | -5.69, 24.54  | 0.2  | 3.01                                                                                   | -6.61, 12.63  | 0.5 |
|                                | Model 2 | 0.39                                                                                   | -11.91, 12.69 | 0.9 | 9.84                                                                                   | -5.31, 25.00  | 0.2  | 3.60                                                                                   | -5.94, 13.14  | 0.4 |
|                                | Model 3 | 1.87                                                                                   | -10.32, 14.07 | 0.7 | 9.20                                                                                   | -5.53, 23.94  | 0.2  | 4.46                                                                                   | -4.95, 13.88  | 0.3 |
|                                | Model 4 | 1.56                                                                                   | -10.63, 13.75 | 0.8 | 9.40                                                                                   | -5.09, 23.89  | 0.2  | 3.98                                                                                   | -5.39, 13.35  | 0.4 |
| HbA1c, %                       | Model 1 | 0.31                                                                                   | -0.21, 0.82   | 0.2 | -0.06                                                                                  | -0.64, 0.52   | 0.8  | 0.15                                                                                   | -0.24, 0.54   | 0.4 |
|                                | Model 2 | 0.28                                                                                   | -0.23, 0.80   | 0.2 | 0.02                                                                                   | -0.57, 0.61   | 0.9  | 0.16                                                                                   | -0.22, 0.55   | 0.4 |
|                                | Model 3 | 0.26                                                                                   | -0.24, 0.77   | 0.3 | -0.0007                                                                                | -0.58, 0.57   | 0.9  | 0.16                                                                                   | -0.23, 0.55   | 0.4 |
|                                | Model 4 | 0.24                                                                                   | -0.26, 0.75   | 0.3 | -0.02                                                                                  | -0.59, 0.55   | 0.9  | 0.13                                                                                   | -0.25, 0.51   | 0.4 |

|                                   |       |              |      |       |               |     |       |              |      |  |
|-----------------------------------|-------|--------------|------|-------|---------------|-----|-------|--------------|------|--|
| Fasting glucose, mg/dL            |       |              |      |       |               |     |       |              |      |  |
| Model 1                           | 12.31 | -2.41, 27.02 | 0.1  | 0.14  | -15.48, 15.75 | 0.9 | 7.08  | -3.96, 18.13 | 0.2  |  |
| Model 2                           | 11.93 | -2.75, 26.61 | 0.1  | 1.61  | -14.09, 17.30 | 0.8 | 7.26  | -3.72, 18.25 | 0.1  |  |
| Model 3                           | 11.20 | -3.41, 25.82 | 0.1  | 1.14  | -14.27, 16.55 | 0.8 | 7.14  | -3.86, 18.15 | 0.2  |  |
| Model 4                           | 10.80 | -3.75, 25.36 | 0.1  | 0.07  | -15.06, 15.21 | 0.9 | 6.28  | -4.61, 17.18 | 0.2  |  |
| 2-h post-challenge glucose, mg/dL |       |              |      |       |               |     |       |              |      |  |
| Model 1                           | 8.48  | -0.42, 17.39 | 0.06 | 0.62  | -8.74, 9.99   | 0.8 | 5.07  | -1.62, 11.77 | 0.1  |  |
| Model 2                           | 8.78  | -0.17, 17.74 | 0.05 | 1.82  | -7.73, 11.37  | 0.7 | 5.57  | -1.19, 12.32 | 0.1  |  |
| Model 3                           | 9.02  | 0.03, 18.02  | 0.05 | 2.06  | -7.34, 11.47  | 0.6 | 6.01  | -0.77, 12.79 | 0.08 |  |
| Model 4                           | 8.64  | -0.19, 17.47 | 0.05 | 1.45  | -7.50, 10.40  | 0.7 | 5.53  | -1.04, 12.10 | 0.09 |  |
| Systolic blood pressure, mmHg     |       |              |      |       |               |     |       |              |      |  |
| Model 1                           | -0.78 | -7.00, 5.44  | 0.8  | -3.85 | -9.64, 1.93   | 0.1 | -1.92 | -6.35, 2.50  | 0.3  |  |
| Model 2                           | -0.70 | -6.92, 5.52  | 0.8  | -3.53 | -9.34, 2.28   | 0.2 | -1.64 | -6.06, 2.78  | 0.4  |  |
| Model 3                           | -0.22 | -6.40, 5.96  | 0.9  | -3.70 | -9.45, 2.05   | 0.2 | -1.52 | -5.92, 2.87  | 0.4  |  |
| Model 4                           | -0.52 | -6.64, 5.59  | 0.8  | -2.86 | -8.30, 2.58   | 0.3 | -1.68 | -6.00, 2.63  | 0.4  |  |
| Diastolic blood pressure, mmHg    |       |              |      |       |               |     |       |              |      |  |
| Model 1                           | -0.36 | -4.01, 3.30  | 0.8  | -1.68 | -5.38, 2.02   | 0.3 | -0.90 | -3.57, 1.77  | 0.5  |  |
| Model 2                           | -0.45 | -4.10, 3.19  | 0.8  | -1.43 | -5.17, 2.31   | 0.4 | -0.77 | -3.43, 1.89  | 0.5  |  |
| Model 3                           | -0.10 | -3.67, 3.47  | 0.9  | -1.72 | -5.36, 1.91   | 0.3 | -0.67 | -3.27, 1.93  | 0.6  |  |
| Model 4                           | -0.36 | -3.88, 3.16  | 0.8  | -1.05 | -4.47, 2.36   | 0.5 | -0.80 | -3.34, 1.74  | 0.5  |  |

1. Sample sizes were 683 and 454 (BMI, waist circumference, waist-height ratio), 662 and 435 (body fat percentage), 670 and 435 (triglycerides, total cholesterol, HDL-c, non-HDL-c, fasting blood glucose), 672 and 435 (HbA1c), 608 and 415 (2-h post-challenge glucose), and 683 and 455 (systolic and diastolic blood pressure) for women and men, respectively. Estimates are the coefficients for the interaction term specifying exposure to *Atole* from 36 – 72 months controlling for: fixed effects of birth village and treatment assignment (*Atole* vs. *Fresco*), age at intervention (exposed from 36 – 72 months vs other), birth year (Model 1); maternal height, age at offspring's birth, and completed grades of schooling, and SES in 1967-75 (Model 2); SES in 2015-7, completed grades of schooling, and current residence (Guatemala City vs other) (Model 3); and current BMI and waist-height ratio (Model 4). Models for systolic blood pressure and diastolic blood pressure additionally controlled for current height and hypertension medication use. Models for HbA1c, fasting blood glucose, and post-challenge glucose additionally controlled for diabetes medication use. Pooled models controlled for sex. For missing covariates, we imputed sex-specific medians for continuous variables and sex-specific modes for discrete variables. We included dummy variables, coded as 1 if the data was missing or 0 otherwise, to account for the uncertainty in the imputed covariates. Confidence intervals account for clustering at the mother level. <sup>†</sup>  $P < 0.10$  for the interaction of sex and exposure to *Atole* from 36 – 72 months.
2. Non-HDL-c defined as LDL-c + IDL + VLDL.

Abbreviations: CI, confidence interval; HbA1c, glycated hemoglobin; IDL, intermediate density lipoprotein; INCAP, Institute of Nutrition for Central America and Panama; SES, socioeconomic status.

**Supplemental Table 14. Multivariate binomial logistic difference-in-difference regression predicting obesity, diabetes, hypertension, and metabolic syndrome in 2015-17 based on Atole exposure from 36 – 72 months in the INCAP Nutrition Supplementation Trial Longitudinal Cohort (n=684 women, n=455 men) <sup>1</sup>.**

| Cardio-metabolic risk factor    |         | Women                                                                                  |     |                | Men                                                                                    |       |                | Pooled                                                                                 |       |                |
|---------------------------------|---------|----------------------------------------------------------------------------------------|-----|----------------|----------------------------------------------------------------------------------------|-------|----------------|----------------------------------------------------------------------------------------|-------|----------------|
|                                 |         | Difference-in-difference estimates for exposure to Atole from 36 - 72 months vs. other |     |                | Difference-in-difference estimates for exposure to Atole from 36 - 72 months vs. other |       |                | Difference-in-difference estimates for exposure to Atole from 36 - 72 months vs. other |       |                |
|                                 |         | Odds Ratio (95% CI)                                                                    | P   | C <sup>2</sup> | Odds Ratio (95% CI)                                                                    | P     | C <sup>2</sup> | Odds Ratio (95% CI)                                                                    | P     | C <sup>2</sup> |
| Obesity <sup>3</sup>            | Model 1 | 0.99 (0.51, 1.94)                                                                      | 0.9 | 0.55           | 1.04 (0.35, 3.08)                                                                      | 0.9   | 0.62           | 1.05 (0.60, 1.83)                                                                      | 0.8   | 0.54           |
|                                 | Model 2 | 0.99 (0.50, 1.96)                                                                      | 0.9 | 0.57           | 1.11 (0.37, 3.39)                                                                      | 0.8   | 0.66           | 1.07 (0.61, 1.89)                                                                      | 0.8   | 0.65           |
|                                 | Model 3 | 1.04 (0.52, 2.08)                                                                      | 0.9 | 0.60           | 1.11 (0.35, 3.52)                                                                      | 0.8   | 0.71           | 1.10 (0.62, 1.94)                                                                      | 0.7   | 0.67           |
| Diabetes <sup>4</sup>           | Model 1 | 1.38 (0.57, 3.35)                                                                      | 0.4 | 0.62           | 2.49 (0.58, 10.65)                                                                     | 0.1   | 0.66           | 1.52 (0.73, 3.17)                                                                      | 0.2   | 0.61           |
|                                 | Model 2 | 1.44 (0.58, 3.57)                                                                      | 0.4 | 0.64           | 3.43 (0.76, 15.41)                                                                     | 0.1   | 0.73           | 1.61 (0.76, 3.40)                                                                      | 0.2   | 0.66           |
|                                 | Model 3 | - <sup>6</sup>                                                                         | -   | -              | 3.03 (0.62, 14.71)                                                                     | 0.1   | 0.77           | 1.67 (0.78, 3.55)                                                                      | 0.1   | 0.67           |
|                                 | Model 4 | -                                                                                      | -   | -              | 3.25 (0.68, 15.44)                                                                     | 0.1   | 0.79           | 1.63 (0.76, 3.50)                                                                      | 0.2   | 0.76           |
| Hypertension <sup>5</sup>       | Model 1 | 0.86 (0.37, 1.97)                                                                      | 0.7 | 0.64           | 0.77 (0.17, 3.49)                                                                      | 0.7   | 0.66           | 0.81 (0.39, 1.67)                                                                      | 0.5   | 0.65           |
|                                 | Model 2 | 0.91 (0.39, 2.12)                                                                      | 0.8 | 0.66           | 0.85 (0.18, 3.96)                                                                      | 0.8   | 0.71           | 0.85 (0.41, 1.78)                                                                      | 0.6   | 0.70           |
|                                 | Model 3 | 1.03 (0.44, 2.42)                                                                      | 0.9 | 0.69           | 0.84 (0.17, 4.14)                                                                      | 0.8   | 0.75           | 0.90 (0.43, 1.89)                                                                      | 0.7   | 0.71           |
|                                 | Model 4 | 0.95 (0.39, 2.27)                                                                      | 0.9 | 0.73           | 0.79 (0.15, 4.24)                                                                      | 0.7   | 0.82           | 0.82 (0.38, 1.75)                                                                      | 0.6   | 0.76           |
| Metabolic syndrome <sup>6</sup> | Model 1 | 0.67 (0.28, 1.57)                                                                      | 0.3 | 0.69           | 0.28 (0.12, 0.69)                                                                      | 0.005 | 0.61           | 0.44 (0.24, 0.82)                                                                      | 0.01  | 0.68           |
|                                 | Model 2 | 0.66 (0.28, 1.56)                                                                      | 0.3 | 0.61           | 0.30 (0.12, 0.74)                                                                      | 0.008 | 0.65           | 0.46 (0.24, 0.85)                                                                      | 0.01  | 0.74           |
|                                 | Model 3 | 0.71 (0.29, 1.70)                                                                      | 0.4 | 0.65           | 0.27 (0.11, 0.67)                                                                      | 0.004 | 0.68           | 0.45 (0.24, 0.85)                                                                      | 0.01  | 0.75           |
|                                 | Model 4 | 0.66 (0.26, 1.66)                                                                      | 0.3 | 0.77           | 0.19 (0.06, 0.55)                                                                      | 0.002 | 0.87           | 0.39 (0.20, 0.77)                                                                      | 0.006 | 0.86           |

1. Sample sizes were 670 and 435 (diabetes) 683 and 455 (hypertension), and 669 and 435 (metabolic syndrome) for women and men, respectively. Estimates are odds ratios and 95% confidence intervals for the interaction term specifying exposure to *Atole* from 36 – 72 months controlling for: fixed effects of birth village and treatment assignment (*Atole* vs. *Fresco*), age at intervention (exposed from 36 – 72 months vs other), birth year, maternal height, age at offspring's birth, and completed grades of schooling, and SES in 1967-75, SES in 2015-7, completed grades of schooling, and current residence (Guatemala City vs other) (Model 3); and current BMI and waist-height ratio (Model 4). Models for hypertension and metabolic syndrome additionally controlled for current height. Pooled models controlled for sex. For missing covariates, we imputed sex-specific medians for continuous variables and sex-specific modes for discrete variables. We included dummy variables, coded as 1 if the data was missing or 0 otherwise, to account for the uncertainty in the imputed covariates. Confidence intervals account for clustering at the mother level.
2. C statistic values >0.70 indicate good model fit.
3. Obesity defined as BMI  $\geq 30$  kg/m<sup>2</sup>.
4. Diabetes defined according to the American Diabetes Association diagnostic criteria: fasting plasma glucose  $\geq 126$  mg/dL, and/or post-challenge glucose  $\geq 200$  mg/dL, and/or diabetes medication use.
5. Hypertension defined according to the Seventh report of the Joint National Committee on Prevention, Detection, Evaluation, and Treatment of High Blood Pressure: systolic blood pressure  $\geq 140$  mmHg and/or diastolic blood pressure  $\geq 90$  mmHg and/or hypertension medication use.

6. Metabolic syndrome defined according to 2005 NCEP ATP III diagnostic criteria as presence of  $\geq 3$  of: central obesity (waist circumference  $>88$  cm for women and  $>102$  cm for men); fasting plasma glucose  $\geq 100$  mg/dL or diabetes medication use; triglycerides  $\geq 150$  mg/dL or lipid medication use; HDL-c  $<50$  mg/dL (women) and  $<40$  mg/dL (men); and blood pressure  $\geq 130$  mmHg systolic,  $\geq 85$  mmHg diastolic and/or hypertension medication use.
7. Maximum likelihood estimation resulted in a non-positive definite solution..

Abbreviations: ADA, American Diabetes Association; CI, confidence interval; INCAP, Institute of Nutrition for Central America and Panama; NCEP ATP III, National Cholesterol Education Program Adult Treatment Panel III; SES, socioeconomic status.

**Supplemental Table 15. Multivariate binomial logistic difference-in-difference regression models predicting metabolic syndrome components in 2015-17 based on *Atole* exposure from 36 – 72 months in the INCAP Nutrition Supplementation Trial Longitudinal Cohort (n=684 women, n=455 men) <sup>1</sup>.**

| Cardio-metabolic risk factor                                   | Women                                                                                         |     |                | Men                                                                                           |      |                | Pooled                                                                                        |     |                |
|----------------------------------------------------------------|-----------------------------------------------------------------------------------------------|-----|----------------|-----------------------------------------------------------------------------------------------|------|----------------|-----------------------------------------------------------------------------------------------|-----|----------------|
|                                                                | Difference-in-difference estimates for exposure to <i>Atole</i> from 36 - 72 months vs. other |     |                | Difference-in-difference estimates for exposure to <i>Atole</i> from 36 - 72 months vs. other |      |                | Difference-in-difference estimates for exposure to <i>Atole</i> from 36 - 72 months vs. other |     |                |
|                                                                | Odds Ratio (95% CI)                                                                           | P   | C <sup>2</sup> | Odds Ratio (95% CI)                                                                           | P    | C <sup>2</sup> | Odds Ratio (95% CI)                                                                           | P   | C <sup>2</sup> |
| Central obesity <sup>3</sup>                                   |                                                                                               |     |                |                                                                                               |      |                |                                                                                               |     |                |
| Model 1                                                        | 0.85 (0.29, 2.49)                                                                             | 0.7 | 0.58           | 0.60 (0.20, 1.75)                                                                             | 0.3  | 0.66           | 0.71 (0.32, 1.52)                                                                             | 0.3 | 0.52           |
| Model 2                                                        | 0.89 (0.30, 2.65)                                                                             | 0.8 | 0.63           | 0.67 (0.22, 2.02)                                                                             | 0.4  | 0.70           | 0.77 (0.36, 1.66)                                                                             | 0.5 | 0.88           |
| Model 3                                                        | 1.00 (0.34, 2.92)                                                                             | 0.9 | 0.68           | 0.66 (0.21, 2.06)                                                                             | 0.4  | 0.73           | 0.76 (0.35, 1.64)                                                                             | 0.4 | 0.89           |
| Elevated fasting plasma glucose or medication use <sup>4</sup> |                                                                                               |     |                |                                                                                               |      |                |                                                                                               |     |                |
| Model 1                                                        | 1.20 (0.61, 2.36)                                                                             | 0.5 | 0.61           | 0.99 (0.42, 2.32)                                                                             | 0.9  | 0.59           | 1.09 (0.64, 1.84)                                                                             | 0.7 | 0.60           |
| Model 2                                                        | 1.21 (0.60, 2.42)                                                                             | 0.5 | 0.65           | 0.99 (0.42, 2.35)                                                                             | 0.9  | 0.60           | 1.10 (0.65, 1.88)                                                                             | 0.7 | 0.63           |
| Model 3                                                        | 1.21 (0.60, 2.44)                                                                             | 0.5 | 0.67           | 0.99 (0.40, 2.29)                                                                             | 0.9  | 0.64           | 1.09 (0.64, 1.87)                                                                             | 0.7 | 0.64           |
| Model 4                                                        | 1.15 (0.56, 3.34)                                                                             | 0.7 | 0.69           | 0.92 (0.37, 2.30)                                                                             | 0.8  | 0.69           | 1.03 (0.59, 1.79)                                                                             | 0.9 | 0.67           |
| Elevated triglycerides or medication use <sup>5</sup>          |                                                                                               |     |                |                                                                                               |      |                |                                                                                               |     |                |
| Model 1                                                        | 0.99 (0.43, 2.28)                                                                             | 0.9 | 0.55           | 0.92 (0.36, 2.38)                                                                             | 0.8  | 0.54           | 0.98 (0.53, 1.83)                                                                             | 0.9 | 0.53           |
| Model 2                                                        | 1.00 (0.43, 2.29)                                                                             | 0.9 | 0.56           | - <sup>7</sup>                                                                                | -    | -              | 0.98 (0.53, 1.83)                                                                             | 0.9 | 0.57           |
| Model 3                                                        | 1.04 (0.44, 2.43)                                                                             | 0.9 | 0.61           | -                                                                                             | -    | -              | 1.02 (0.54, 1.91)                                                                             | 0.9 | 0.59           |
| Model 4                                                        | 1.02 (0.43, 2.41)                                                                             | 0.9 | 0.65           | -                                                                                             | -    | -              | 0.99 (0.52, 1.89)                                                                             | 0.9 | 0.67           |
| Low HDL-c <sup>6</sup>                                         |                                                                                               |     |                |                                                                                               |      |                |                                                                                               |     |                |
| Model 1                                                        | 0.82 (0.31, 2.20)                                                                             | 0.7 | 0.58           | 0.37 (0.13, 1.06)                                                                             | 0.06 | 0.63           | 0.58 (0.28, 1.20)                                                                             | 0.1 | 0.57           |
| Model 2                                                        | -                                                                                             | -   | -              | 0.40 (0.14, 1.17)                                                                             | 0.09 | 0.66           | 0.58 (0.28, 1.19)                                                                             | 0.1 | 0.67           |
| Model 3                                                        | -                                                                                             | -   | -              | 0.43 (0.15, 1.24)                                                                             | 0.1  | 0.68           | 0.59 (0.28, 1.23)                                                                             | 0.1 | 0.68           |
| Model 4                                                        | -                                                                                             | -   | -              | 0.41 (0.13, 1.32)                                                                             | 0.1  | 0.78           | 0.58 (0.27, 1.23)                                                                             | 0.1 | 0.75           |
| Elevated blood pressure or medication use <sup>7</sup>         |                                                                                               |     |                |                                                                                               |      |                |                                                                                               |     |                |
| Model 1                                                        | 1.37 (0.68, 2.74)                                                                             | 0.3 | 0.61           | 0.54 (0.22, 1.33)                                                                             | 0.1  | 0.60           | 0.99 (0.58, 1.71)                                                                             | 0.9 | 0.59           |
| Model 2                                                        | 1.37 (0.68, 2.77)                                                                             | 0.3 | 0.63           | 0.56 (0.22, 1.41)                                                                             | 0.2  | 0.63           | 1.03 (0.60, 1.78)                                                                             | 0.9 | 0.61           |
| Model 3                                                        | 1.47 (0.71, 3.02)                                                                             | 0.2 | 0.66           | 0.54 (0.21, 1.37)                                                                             | 0.1  | 0.65           | 1.03 <sup>†</sup> (0.59, 1.79)                                                                | 0.9 | 0.63           |
| Model 4                                                        | 1.39 (0.67, 2.89)                                                                             | 0.3 | 0.69           | 0.60 (0.23, 1.58)                                                                             | 0.3  | 0.74           | 0.99 (0.56, 1.76)                                                                             | 0.9 | 0.69           |

1. Sample sizes were 683 and 454 (central obesity, metabolic syndrome), 670 and 435 (elevated fasting plasma glucose, triglycerides, HDL-c) and 683 and 455 (elevated blood pressure) for women and men, respectively. Estimates are odds ratios and 95% confidence intervals for the interaction term specifying exposure to *Atole* from 36 – 72 months controlling for: fixed effects of birth village and treatment assignment (*Atole* vs. *Fresco*), age at intervention (exposed from 36 – 72 months vs other) and birth year (Model 1); maternal height, age at offspring's birth, and completed grades of schooling, and SES in 1967-75 (Model 2); SES in 2015-7, completed grades of schooling, and current residence (Guatemala City vs other) (Model 3); and current BMI and waist-height ratio (Model 4). Models for elevated blood pressure additionally controlled for current height. Pooled models controlled for sex. For missing covariates, we imputed sex-specific medians for continuous variables and sex-specific modes for discrete variables. We included dummy variables, coded as 1 if the data was missing or 0 otherwise, to account for the uncertainty in the imputed covariates. Confidence intervals account for clustering at the mother level. <sup>†</sup>  $P < 0.10$  for sex and exposure to *Atole* from 36 – 72 months interaction.

2. C statistic values  $>0.70$  indicate good model fit.
3. Central obesity defined as waist circumference  $>88$  cm for women and  $>102$  cm for men.
4. Elevated fasting plasma glucose ( $\geq 100$  mg/dL) or diabetes medication use.
5. Elevated triglycerides defined as  $\geq 150$  mg/dL or lipid medication use.
6. Low HDL-c defined as HDL-c  $<50$  mg/dL for women and  $<40$  mg/dL for men.
7. Elevated blood pressure defined as systolic blood pressure  $\geq 130$  mmHg and/or diastolic blood pressure  $\geq 85$  mmHg and/or hypertension medication use.
8. Maximum likelihood estimation resulted in a non-positive definite solution.

Abbreviations: CI, confidence interval; HDL-c, high density lipoprotein cholesterol; INCAP, Institute of Nutrition for Central America and Panama; NCEP ATP III, National Cholesterol Education Program Adult Treatment Panel III; SES, socioeconomic status.
